# Supplementary material for: Researching COVID to enhance recovery (RECOVER) adult study protocol: Rationale, objectives, and design
Source: bioRxiv or medRxiv preprint supplement (doi:10.1101/2023.05.26.23290475), 2023-05-28
Supplement: Supplementary file [file media-1.pdf]

# Supporting information

## S1 Figure: Protocol Development Timeline

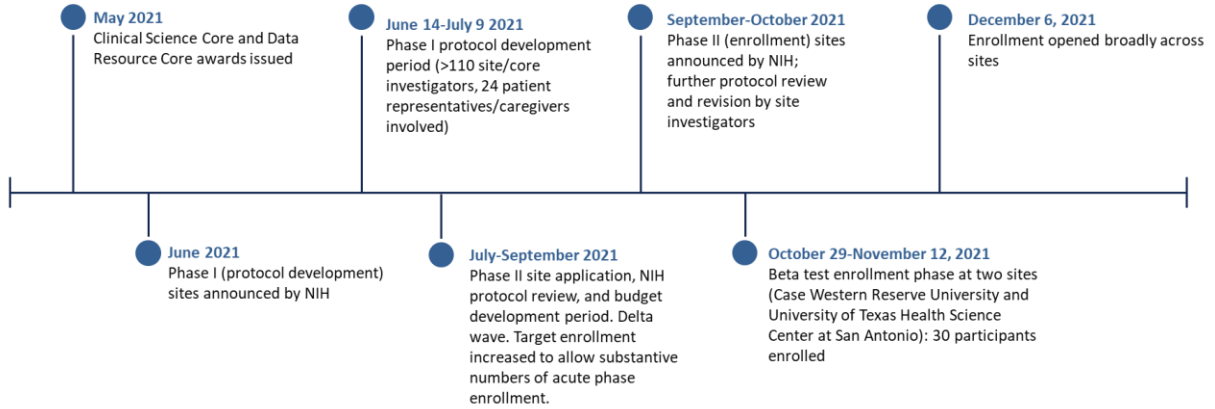

**S2 Figure: RECOVER Consortium Oversight Structure**

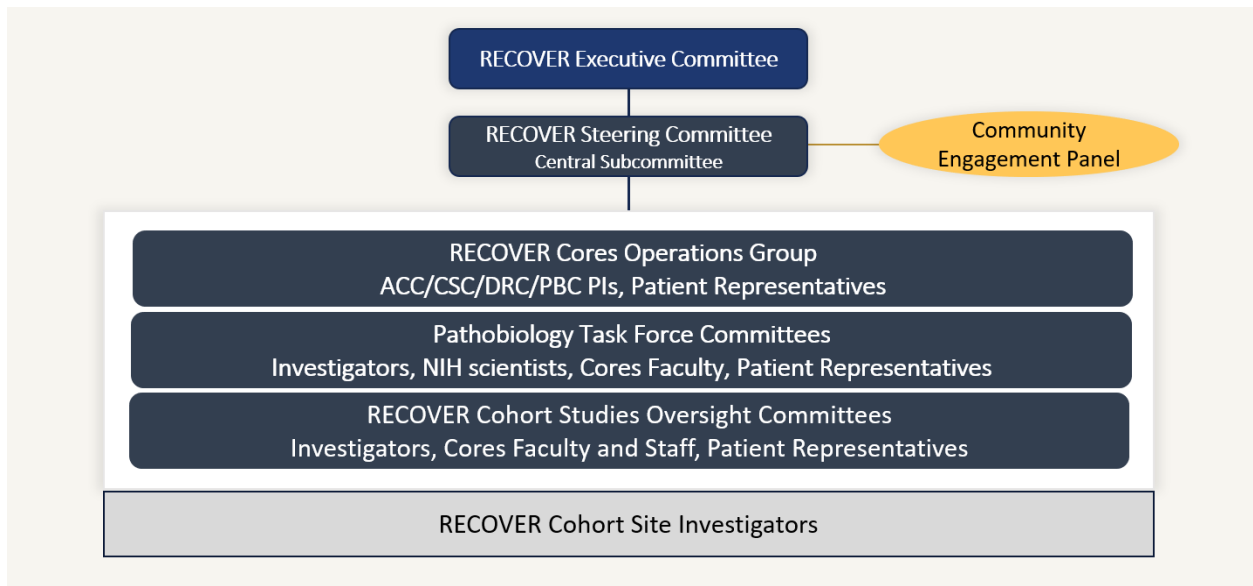

ACC: Administrative Coordinating Center; CSC: Clinical Science Core; DRC: Data Resource Core; PBC: PASC Biorepository Core; PI: Principal Investigator; NIH: National Institutes of Health

**S1 Table: Hubs and Enrolling Sites**

| <b>Hub/consortium name</b>                            | <b>Enrolling site</b>                                                                                       | <b>Location</b> |
|-------------------------------------------------------|-------------------------------------------------------------------------------------------------------------|-----------------|
| Atlanta RECOVER Clinical Research Site (CRS)          | Atlanta VA Health Care System                                                                               | Georgia         |
| Atlanta RECOVER Clinical Research Site (CRS)          | Emory Healthcare, Hope Clinic                                                                               | Georgia         |
| Atlanta RECOVER Clinical Research Site (CRS)          | Grady Health System                                                                                         | Georgia         |
| Atlanta RECOVER Clinical Research Site (CRS)          | Kaiser Permanente of Georgia                                                                                | Georgia         |
| Atlanta RECOVER Clinical Research Site (CRS)          | Morehouse School of Medicine                                                                                | Georgia         |
| Boston COVID-19 Recovery Cohort                       | Beth Israel Lahey Health                                                                                    | Massachusetts   |
| Boston COVID-19 Recovery Cohort                       | Boston University, Boston Medical Center                                                                    | Massachusetts   |
| Boston COVID-19 Recovery Cohort                       | Brigham and Women's Hospital                                                                                | Massachusetts   |
| Boston COVID-19 Recovery Cohort                       | Cambridge Health Alliance                                                                                   | Massachusetts   |
| Boston COVID-19 Recovery Cohort                       | Massachusetts General Hospital                                                                              | Massachusetts   |
| Boston COVID-19 Recovery Cohort                       | South Shore Hospital                                                                                        | Massachusetts   |
| Boston COVID-19 Recovery Cohort                       | Tufts Medical Center                                                                                        | Massachusetts   |
| Deep South SARS-CoV-2 Recovery Cohort                 | University Medical Center New Orleans                                                                       | Louisiana       |
| Deep South SARS-CoV-2 Recovery Cohort                 | University of Alabama at Birmingham                                                                         | Alabama         |
| Deep South SARS-CoV-2 Recovery Cohort                 | University of South Alabama                                                                                 | Alabama         |
| Howard University                                     | Howard University                                                                                           | Washington DC   |
| Howard University                                     | Mercy Medical Center, University of Maryland                                                                | Maryland        |
| IDEA States Consortium for Clinical Research (ISCORE) | Hispanic Alliance for Clinical and Translational Research, University of Puerto Rico Medical Science Campus | Puerto Rico     |

| <b>Hub/consortium name</b>                            | <b>Enrolling site</b>                                         | <b>Location</b> |
|-------------------------------------------------------|---------------------------------------------------------------|-----------------|
| IDEA States Consortium for Clinical Research (ISCORE) | Louisiana State University Health Sciences Center New Orleans | Louisiana       |
| IDEA States Consortium for Clinical Research (ISCORE) | Pennington Biomedical Research Center                         | Louisiana       |
| IDEA States Consortium for Clinical Research (ISCORE) | MaineHealth Northern New England IDEa CTR                     | Maine           |
| IDEA States Consortium for Clinical Research (ISCORE) | Sanford Health                                                | South Dakota    |
| IDEA States Consortium for Clinical Research (ISCORE) | Tulane School of Medicine                                     | Louisiana       |
| IDEA States Consortium for Clinical Research (ISCORE) | University of Hawaii Mountain West CTR                        | Hawaii          |
| IDEA States Consortium for Clinical Research (ISCORE) | University of Kansas Medical Center                           | Kansas          |
| IDEA States Consortium for Clinical Research (ISCORE) | University of Kentucky                                        | Kentucky        |
| IDEA States Consortium for Clinical Research (ISCORE) | University of Mississippi Medical Center                      | Mississippi     |
| IDEA States Consortium for Clinical Research (ISCORE) | University of Nebraska Medical Center                         | Nebraska        |
| IDEA States Consortium for Clinical Research (ISCORE) | University of Oklahoma Health Sciences Center                 | Oklahoma        |
| IDEA States Consortium for Clinical Research (ISCORE) | West Virginia University                                      | West Virginia   |
| ILLInet                                               | BrightStar Community Outreach                                 | Illinois        |
| ILLInet                                               | Illinois Unidos                                               | Illinois        |
| ILLInet                                               | Mile Square Health Centers                                    | Illinois        |
| ILLInet                                               | Peoria City, County Health Department                         | Illinois        |
| ILLInet                                               | UI Hospital & Clinics                                         | Illinois        |
| Mount Sinai PASC Coalition (SinaiPACT)                | Icahn School of Medicine at Moloraunt Sinai                   | New York        |
| Mountain States PASC Collaborative                    | Bateman Horne Center                                          | Utah            |

| <b>Hub/consortium name</b>                                                       | <b>Enrolling site</b>                                               | <b>Location</b> |
|----------------------------------------------------------------------------------|---------------------------------------------------------------------|-----------------|
| Mountain States PASC Collaborative                                               | Denver Health and Hospital Authority                                | Colorado        |
| Mountain States PASC Collaborative                                               | Intermountain Healthcare                                            | Utah            |
| Mountain States PASC Collaborative                                               | University of Colorado Anschutz Medical Campus                      | Colorado        |
| Mountain States PASC Collaborative                                               | University of New Mexico Health Sciences Center                     | New Mexico      |
| Mountain States PASC Collaborative                                               | University of Utah                                                  | Utah            |
| NorthEast Ohio Covid United for REcovery (NEO-CURE)                              | Case Western Reserve University, University Hospitals Health System | Ohio            |
| NorthEast Ohio Covid United for REcovery (NEO-CURE)                              | Case Western Reserve University, The MetroHealth System             | Ohio            |
| The Pacific Northwest Consortium for Post-Acute Sequelae of SARS-CoV-2 Infection | Institute for Systems Biology                                       | Washington      |
| The Pacific Northwest Consortium for Post-Acute Sequelae of SARS-CoV-2 Infection | Providence Swedish Medical Center                                   | Washington      |
| The Pacific Northwest Consortium for Post-Acute Sequelae of SARS-CoV-2 Infection | University of Washington                                            | Washington      |
| The Pacific Northwest Consortium for Post-Acute Sequelae of SARS-CoV-2 Infection | Providence Sacred Heart Medical Center                              | Washington      |
| The Pacific Northwest Consortium for Post-Acute Sequelae of SARS-CoV-2 Infection | Providence Regional Medical Center Everett                          | Washington      |
| The Pacific Northwest Consortium for Post-Acute Sequelae of SARS-CoV-2 Infection | Cedars Sinai LA                                                     | California      |
| PREVAIL South Texas                                                              | University of Texas Health Science Center at San Antonio            | Texas           |
| PREVAIL South Texas                                                              | University of Texas Education and Research Center at Laredo         | Texas           |
| Stanford Post-Acute Recovery Cohort (SPARC)                                      | Stanford University                                                 | California      |

| <b>Hub/consortium name</b>                                                       | <b>Enrolling site</b>                                                      | <b>Location</b> |
|----------------------------------------------------------------------------------|----------------------------------------------------------------------------|-----------------|
| Stanford Post-Acute Recovery Cohort (SPARC)                                      | Stanford Health Care Tri-Valley                                            | California      |
| United Against COVID - AZPC3 Consortium                                          | Banner University Medical Center Tucson                                    | Arizona         |
| United Against COVID - AZPC3 Consortium                                          | Banner University Medical Center, Phoenix                                  | Arizona         |
| United Against COVID - AZPC3 Consortium                                          | University of Arizona                                                      | Arizona         |
| University of California San Francisco                                           | Chan Zuckerberg San Francisco General Hospital                             | California      |
| University of California San Francisco                                           | San Mateo County Health Department                                         | California      |
| University of California San Francisco                                           | UCSF Parnassus Medical Center                                              | California      |
| PRIORITY: Post-Acute Sequelae of SARS-CoV-2 in Pregnant Women and their Children | University of California San Francisco, and nationally through home visits | California      |
| MFMU PASC-PREG                                                                   | University of Utah (Pregnancy)                                             | Utah            |
| MFMU PASC-PREG                                                                   | University of Alabama at Birmingham (pregnancy)                            | Alabama         |
| MFMU PASC-PREG                                                                   | University of Texas Health Science Center at Houston                       | Texas           |
| MFMU PASC-PREG                                                                   | University of Texas Medical Branch at Galveston                            | Texas           |
| MFMU PASC-PREG                                                                   | UH MacDonald's Women's Hospital                                            | Ohio            |
| MFMU PASC-PREG                                                                   | Yale University                                                            | Connecticut     |
| MFMU PASC-PREG                                                                   | University of Pittsburgh, Magee                                            | Pennsylvania    |
| MFMU PASC-PREG                                                                   | University of Pennsylvania                                                 | Pennsylvania    |
| MFMU PASC-PREG                                                                   | University of North Carolina Chapel Hill                                   | North Carolina  |
| MFMU PASC-PREG                                                                   | Saint Peter's University Hospital                                          | New Jersey      |
| MFMU PASC-PREG                                                                   | Ohio State University                                                      | Ohio            |
| MFMU PASC-PREG                                                                   | Northwestern University                                                    | Illinois        |

| <b>Hub/consortium name</b> | <b>Enrolling site</b>                                      | <b>Location</b> |
|----------------------------|------------------------------------------------------------|-----------------|
| MFMU PASC-PREG             | NorthShore University HealthSystem                         | Illinois        |
| MFMU PASC-PREG             | New York-Presbyterian, Queens                              | New York        |
| MFMU PASC-PREG             | Miami Valley Hospital                                      | Ohio            |
| MFMU PASC-PREG             | Case Western, MetroHealth Medical                          | Ohio            |
| MFMU PASC-PREG             | Medical College of Wisconsin                               | Wisconsin       |
| MFMU PASC-PREG             | Good Samaritan                                             | Ohio            |
| MFMU PASC-PREG             | Duke University Medical Center                             | North Carolina  |
| MFMU PASC-PREG             | ChristianaCare                                             | Delaware        |
| MFMU PASC-PREG             | Memorial City Medical Center                               | Texas           |
| MFMU PASC-PREG             | Brown University, Women & Infants Hospital of Rhode Island | Rhode Island    |
| MFMU PASC-PREG             | LBJ Hospital                                               | Texas           |
| MFMU PASC-PREG             | Columbia University                                        | New York        |
| MFMU PASC-PREG             | University of Colorado                                     | Colorado        |

**S2 Table: Survey Topics as of Protocol Version 7.0\***

| <b>Survey instrument</b> | <b>Topic</b>                                    | <b>Asked at follow up</b> | <b>Source of question, if not RECOVER</b> |
|--------------------------|-------------------------------------------------|---------------------------|-------------------------------------------|
| Demographics             | Name and contact information (retained locally) | ✓                         |                                           |
| Demographics             | Alternate contacts (retained locally)           | ✓                         |                                           |
| Demographics             | Date of birth                                   |                           |                                           |
| Demographics             | Race and ethnicity                              |                           | All of Us                                 |
| Demographics             | Biological sex                                  |                           | RADx Global Codebook                      |
| Demographics             | Gender identity                                 |                           | All of Us                                 |
| Demographics             | Sexual orientation                              |                           | All of Us                                 |
| Social determinants      | Education                                       |                           | NHANES                                    |
| Social determinants      | Number of people in household                   |                           | American Community Survey                 |
| Social determinants      | Homelessness                                    | ✓                         |                                           |
| Social determinants      | Description of living place                     |                           | American Community Survey                 |
| Demographics             | Marital status                                  | ✓                         | BRFSS                                     |
| Social determinants      | Employment                                      | ✓                         | RADx Global Codebook                      |
| Social determinants      | Health insurance                                | ✓                         | American Community Survey                 |
| Social determinants      | Birthplace                                      |                           | American Community Survey                 |
| Social determinants      | Primary language                                |                           | California Health Interview Survey        |
| Social determinants      | Fluency in English                              |                           | California Health Interview Survey        |



| <b>Survey instrument</b> | <b>Topic</b>                                           | <b>Asked at follow up</b> | <b>Source of question, if not RECOVER</b>             |
|--------------------------|--------------------------------------------------------|---------------------------|-------------------------------------------------------|
| Social determinants      | Income in 2019                                         |                           | National Health Interview Survey                      |
| Social determinants      | Financial insecurity                                   | ✓                         | RAND American Life Panel Impacts of COVID-19 Survey   |
| Social determinants      | Food insecurity                                        |                           | Hunger Vital Sign                                     |
| Social determinants      | Access to health care                                  |                           | National Health Interview Survey                      |
| Social determinants      | Social support                                         |                           | Medical Outcomes Study (MOS) Social Support Survey    |
| Social determinants      | <del>Loss of insurance because of COVID pandemic</del> |                           |                                                       |
| Social determinants      | Community cohesion                                     |                           | Project on Human Development in Chicago Neighborhoods |
| Social determinants      | Discrimination                                         |                           | Everyday Discrimination Scale                         |
| Social determinants      | Alcohol and substance use                              | ✓                         | TAPS Part 1                                           |
| Baseline disability      | Baseline disability                                    |                           | CDC Disability                                        |
| Acute COVID              | Diagnosis method                                       |                           |                                                       |
| Acute COVID              | Site and level of care for initial infection           |                           | WHO PASC CRF                                          |
| Acute COVID              | Treatments received for initial infection              |                           | Modified WHO PASC CRF                                 |
| Pregnancy                | Pregnancy status                                       | ✓                         | RADx-UP                                               |
| Pregnancy                | Pregnancy outcomes                                     | ✓                         | Modified WHO PASC CRF                                 |
| Vaccination              | Vaccination status and vaccine details                 | ✓                         | WHO PASC CRF                                          |

| <b>Survey instrument</b> | <b>Topic</b>                                                                                      | <b>Asked at follow up</b> | <b>Source of question, if not RECOVER</b> |
|--------------------------|---------------------------------------------------------------------------------------------------|---------------------------|-------------------------------------------|
| Comorbidity              | Immunocompromised condition and specific types                                                    | ✓                         |                                           |
| Comorbidity              | Rheumatologic, autoimmune or connective tissue disease and specific types                         | ✓                         |                                           |
| Comorbidity              | Diabetes and specific type                                                                        | ✓                         |                                           |
| Comorbidity              | Kidney disease and specific type                                                                  | ✓                         |                                           |
| Comorbidity              | Active cancer and specific type                                                                   | ✓                         |                                           |
| Comorbidity              | Dementia or cognitive impairment and specific type                                                | ✓                         | NIH/NINDS<br>NeuroCOVID Databank          |
| Comorbidity              | Central nervous system infection, inflammatory disease or demyelinating disease and specific type | ✓                         | NIH/NINDS<br>NeuroCOVID Databank          |
| Comorbidity              | Seizure disorder                                                                                  | ✓                         |                                           |
| Comorbidity              | Neuromuscular disease and specific type                                                           | ✓                         | NIH/NINDS<br>NeuroCOVID Databank          |
| Comorbidity              | Movement disorder and specific type                                                               | ✓                         | NIH/NINDS<br>NeuroCOVID Databank          |
| Comorbidity              | Cardiovascular disease and specific type                                                          | ✓                         |                                           |
| Comorbidity              | Stroke or bleed and specific type                                                                 | ✓                         | NIH/NINDS<br>NeuroCOVID Databank          |
| Comorbidity              | Asthma                                                                                            | ✓                         |                                           |
| Comorbidity              | Chronic obstructive pulmonary disease                                                             | ✓                         |                                           |
| Comorbidity              | Other chronic lung disease                                                                        | ✓                         |                                           |
| Comorbidity              | Use of oxygen at home                                                                             | ✓                         |                                           |

| <b>Survey instrument</b> | <b>Topic</b>                                                                  | <b>Asked at follow up</b> | <b>Source of question, if not RECOVER</b>     |
|--------------------------|-------------------------------------------------------------------------------|---------------------------|-----------------------------------------------|
| Comorbidity              | Anxiety, depression or PTSD                                                   | ✓                         |                                               |
| Comorbidity              | Schizophrenia or bipolar disorder                                             | ✓                         |                                               |
| Comorbidity              | Other mental health disorder                                                  | ✓                         |                                               |
| Comorbidity              | Chronic liver disease                                                         | ✓                         |                                               |
| Comorbidity              | Sickle cell anemia                                                            | ✓                         |                                               |
| Comorbidity              | Chronic pain syndrome or fibromyalgia                                         | ✓                         |                                               |
| Comorbidity              | Myalgic encephalomyelitis/chronic fatigue syndrome                            | ✓                         |                                               |
| Comorbidity              | POTS or other form of dysautonomia or autonomic dysfunction and specific type | ✓                         |                                               |
| Comorbidity              | Obesity                                                                       | ✓                         |                                               |
| Comorbidity              | Polycystic ovarian syndrome                                                   | ✓                         |                                               |
| Medications              | Complete medication list                                                      | ✓                         |                                               |
| Symptoms                 | Global health                                                                 | ✓                         | PROMIS-10 v1.2                                |
| Symptoms                 | Quality of life                                                               | ✓                         | PROMIS-10 v1.2                                |
| Symptoms                 | Physical health and function, and details                                     | ✓                         | PROMIS10 v1.2, PROMIS physical function SF 4a |
| Symptoms                 | Mental health and thinking                                                    | ✓                         | PROMIS-10 v1.2                                |
| Symptoms                 | Social activities satisfaction and ability                                    | ✓                         | PROMIS-10 v1.2                                |
| Symptoms                 | Anxiety, depression, irritability                                             | ✓                         | PROMIS10 v1.2                                 |
| Symptoms                 | Fatigue                                                                       | ✓                         | PROMIS 10 v1.2                                |

| <b>Survey instrument</b> | <b>Topic</b>                                          | <b>Asked at follow up</b> | <b>Source of question, if not RECOVER</b>                                                                   |
|--------------------------|-------------------------------------------------------|---------------------------|-------------------------------------------------------------------------------------------------------------|
| Symptoms                 | Pain                                                  | ✓                         | PROMIS 10 v1.2                                                                                              |
| Symptoms                 | Post-exertional malaise                               | ✓                         |                                                                                                             |
| Symptoms                 | Weakness in limbs                                     | ✓                         | WHO PASC CRF                                                                                                |
| Symptoms                 | Fever, chills, sweats or flushing                     | ✓                         |                                                                                                             |
| Symptoms                 | Loss of or change in smell or taste                   | ✓                         |                                                                                                             |
| Symptoms                 | Pain and details                                      | ✓                         |                                                                                                             |
| Symptoms                 | Headache and details                                  | ✓                         | Headache Inventory Test-6                                                                                   |
| Symptoms                 | Chest pain and details                                | ✓                         | Seattle Angina Questionnaire                                                                                |
| Symptoms                 | Shortness of breath or trouble breathing and details  | ✓                         | modified Medical Research Council scale                                                                     |
| Symptoms                 | Cough                                                 | ✓                         |                                                                                                             |
| Symptoms                 | Palpitations, racing heart, arrhythmia, skipped beats | ✓                         |                                                                                                             |
| Symptoms                 | Swelling of lower legs and details                    | ✓                         |                                                                                                             |
| Symptoms                 | Gastrointestinal symptoms and details                 | ✓                         | COMPASS-31                                                                                                  |
| Symptoms                 | Bladder problems and details                          | ✓                         | COMPASS-31                                                                                                  |
| Symptoms                 | Nerve problems and details                            | ✓                         | PROMIS physical function 4a;<br>Neuro-QoL SF Upper extremity function v1.0;<br>Michigan neuropathy screener |
| Symptoms                 | Problems thinking or concentrating and details        | ✓                         | Neuro-QoL Cognitive Function SF v2.0                                                                        |
| Symptoms                 | Problems with sleep and details                       | ✓                         | PROMIS Sleep                                                                                                |

| <b>Survey instrument</b> | <b>Topic</b>                                                                                                               | <b>Asked at follow up</b> | <b>Source of question, if not RECOVER</b>                            |
|--------------------------|----------------------------------------------------------------------------------------------------------------------------|---------------------------|----------------------------------------------------------------------|
|                          |                                                                                                                            |                           | Disturbance 8a                                                       |
| Symptoms                 | Orthostatic symptoms and details                                                                                           | ✓                         | COMPASS-31                                                           |
| Symptoms                 | Skin color changes and details                                                                                             | ✓                         | COMPASS-31                                                           |
| Symptoms                 | Skin rash                                                                                                                  | ✓                         |                                                                      |
| Symptoms                 | Changes in sweating                                                                                                        | ✓                         | COMPASS-31                                                           |
| Symptoms                 | Excessively dry eyes                                                                                                       | ✓                         | COMPASS-31                                                           |
| Symptoms                 | Excessively dry mouth                                                                                                      | ✓                         | COMPASS-31                                                           |
| Symptoms                 | Excessive thirst                                                                                                           | ✓                         |                                                                      |
| Symptoms                 | Vision problems (blurry, light sensitivity, difficulty reading or focusing, floaters, flashing lights, "snow") and details | ✓                         | COMPASS-31, NEI Visual Functioning Questionnaire 25                  |
| Symptoms                 | Problems with hearing (hearing loss, ringing in ears) and details                                                          | ✓                         |                                                                      |
| Symptoms                 | Hair loss                                                                                                                  | ✓                         |                                                                      |
| Symptoms                 | Problems with teeth or gums                                                                                                | ✓                         |                                                                      |
| Symptoms                 | Change in menstruation or menopause and details                                                                            | ✓                         |                                                                      |
| Symptoms                 | Changes in desire for, comfort with or capacity for sex                                                                    | ✓                         | SHOW-Q (females), UCLA Prostate Cancer Index sexual function (males) |
| Symptoms                 | Depression screen and assessment                                                                                           | ✓                         | PHQ-8                                                                |
| Symptoms                 | Suicidality screen and assessment                                                                                          | ✓                         | PHQ-9, CSSRS suicidality screener                                    |
| Symptoms                 | Anxiety screen and assessment                                                                                              | ✓                         | Generalized Anxiety Disorder-7                                       |

| <b>Survey instrument</b> | <b>Topic</b>                                              | <b>Asked at follow up</b> | <b>Source of question, if not RECOVER</b> |
|--------------------------|-----------------------------------------------------------|---------------------------|-------------------------------------------|
| Symptoms                 | Prolonged grief screen and assessment                     | ✓                         | Prolonged Grief-13r                       |
| Symptoms                 | Stress                                                    | ✓                         | Perceived Stress Scale-4                  |
| Post-COVID utilization   | Hospitalization since COVID or last assessment            | ✓                         |                                           |
| Post-COVID utilization   | Emergency department visit since COVID or last assessment | ✓                         |                                           |

\*Strikethrough text: Measure in earlier version of the protocol

**S3 Table: Tier 1 Assessments**

| <b>Category</b>     | <b>Assessment</b>                                                                                                                | <b>In original protocol Tier 1</b> | <b>In current protocol Tier 1 (v7.0)</b> |
|---------------------|----------------------------------------------------------------------------------------------------------------------------------|------------------------------------|------------------------------------------|
| Clinical assessment | Height, weight, body mass index                                                                                                  | ✓                                  | ✓                                        |
| Clinical assessment | Waist circumference                                                                                                              | ✓                                  | ✓                                        |
| Clinical assessment | Seated vital signs (blood pressure, heart rate, respiratory rate, oxygen saturation)                                             | ✓                                  | ✓                                        |
| Clinical assessment | 30 second sit to stand                                                                                                           | ✓                                  | ✓                                        |
| Clinical assessment | Active standing test                                                                                                             | ✓                                  | ✓                                        |
| Clinical assessment | Wearable with continuous remote monitoring for electrocardiogram, respiratory rate, oxygenation, sleep fragmentation, actigraphy | ✓                                  | ✓                                        |
| Laboratory study    | Comprehensive metabolic panel with cystatin-C                                                                                    | ✓                                  | ✓                                        |
| Laboratory study    | Complete blood count with differential                                                                                           | ✓                                  | ✓                                        |
| Laboratory study    | Lipid panel                                                                                                                      | ✓                                  | ✓                                        |
| Laboratory study    | Hemoglobin A1c                                                                                                                   | ✓                                  | ✓                                        |
| Laboratory study    | Prothrombin time, international normalized ratio, partial thromboplastin time                                                    |                                    | ✓                                        |
| Laboratory study    | D-dimer                                                                                                                          |                                    | ✓                                        |
| Laboratory study    | Troponin                                                                                                                         |                                    | ✓                                        |
| Laboratory study    | N-terminal pro-brain natriuretic peptide                                                                                         |                                    | ✓                                        |
| Laboratory study    | Thyroid stimulating hormone, free T4                                                                                             | ✓                                  | ✓                                        |
| Laboratory study    | Anti nuclear antibody                                                                                                            | ✓                                  |                                          |
| Laboratory study    | Rheumatoid factor                                                                                                                | ✓                                  |                                          |

| <b>Category</b>  | <b>Assessment</b>                                                                   | <b>In original protocol Tier 1</b> | <b>In current protocol Tier 1 (v7.0)</b> |
|------------------|-------------------------------------------------------------------------------------|------------------------------------|------------------------------------------|
| Laboratory study | Anti-cyclic citrullinated peptide antibodies                                        | ✓                                  |                                          |
| Laboratory study | EBV anti early antigen IgG, viral capsid IgM, viral capsid IgG, nuclear antigen IgG | ✓                                  |                                          |
| Laboratory study | 25-hydroxy vitamin D                                                                | ✓                                  | ✓                                        |
| Laboratory study | Urinalysis                                                                          | ✓                                  | ✓                                        |
| Laboratory study | Urine microalbumin and creatinine                                                   | ✓                                  | ✓                                        |
| Laboratory study | hsCRP                                                                               | ✓                                  | ✓                                        |
| Laboratory study | SARS-CoV-2 spike and/or nucleocapsid antibody                                       | ✓                                  | ✓                                        |
| Laboratory study | SARS-CoV-2 NAAT                                                                     | ✓                                  | ✓                                        |



**S4 Table: Tier 2 Assessments**

| <b>Category</b> | <b>Assessment</b>                                                | <b>In original protocol Tier 2</b> | <b>In current protocol Tier 2 (v7.0)</b> | <b>Performed in pregnant, &lt;3 month post-partum</b> |
|-----------------|------------------------------------------------------------------|------------------------------------|------------------------------------------|-------------------------------------------------------|
| Examination     | Home sleep test                                                  | ✓                                  | ✓                                        | ✓                                                     |
| Examination     | 6 minute walk test                                               | ✓                                  | ✓                                        | ✓                                                     |
| Examination     | Complete neurologic exam                                         | ✓                                  |                                          | ✓                                                     |
| Examination     | Neuropathy exam                                                  |                                    | ✓                                        |                                                       |
| Examination     | Cardiovagal innervation testing                                  | ✓                                  |                                          | ✓                                                     |
| Examination     | Rehabilitation exam                                              | ✓                                  | ✓                                        | ✓                                                     |
| Examination     | Ears, nose, throat exam                                          |                                    | ✓                                        | ✓                                                     |
| Examination     | Mini International Neuropsychiatric Interview (MINI)             | ✓                                  | ✓                                        | ✓                                                     |
| Examination     | Vision screen                                                    | ✓                                  | ✓                                        | ✓                                                     |
| Examination     | Smell Test                                                       | ✓                                  | ✓                                        | ✓                                                     |
| Examination     | NIH Toolbox oral reading recognition test age 3+ v2.0            | ✓                                  | ✓                                        | ✓                                                     |
| Examination     | NIH Toolbox picture vocabulary test age 3+ v2.0                  | ✓                                  | ✓                                        | ✓                                                     |
| Examination     | NIH Toolbox auditory verbal learning test (Rey) 8+ v2.0          | ✓                                  | ✓                                        | ✓                                                     |
| Examination     | NIH Flanker inhibitory control and attention test age 12+ v2.1   | ✓                                  | ✓                                        | ✓                                                     |
| Examination     | NIH Toolbox pattern comparison processing speed test age 7+ v2.1 | ✓                                  | ✓                                        | ✓                                                     |
| Examination     | NIH Toolbox picture sequence age 7+ v2.1                         |                                    | ✓                                        | ✓                                                     |

| <b>Category</b>  | <b>Assessment</b>                                                                   | <b>In original protocol Tier 2</b> | <b>In current protocol Tier 2 (v7.0)</b> | <b>Performed in pregnant, &lt;3 month post-partum</b> |
|------------------|-------------------------------------------------------------------------------------|------------------------------------|------------------------------------------|-------------------------------------------------------|
| Laboratory study | Procalcitonin                                                                       | ✓                                  |                                          | ✓                                                     |
| Laboratory study | EBV anti early antigen IgG, viral capsid IgM, viral capsid IgG, nuclear antigen IgG |                                    | ✓                                        | ✓                                                     |
| Laboratory study | Anti-nuclear antibody                                                               |                                    | ✓                                        | ✓                                                     |
| Laboratory study | Anti-cyclic citrullinated peptide antibodies                                        |                                    | ✓                                        | ✓                                                     |
| Laboratory study | Rheumatoid factor                                                                   |                                    | ✓                                        | ✓                                                     |
| Laboratory study | Anti-dsDNA antibody                                                                 | ✓                                  | ✓                                        | ✓                                                     |
| Laboratory study | Ro antibody                                                                         | ✓                                  | ✓                                        | ✓                                                     |
| Laboratory study | La antibody                                                                         | ✓                                  | ✓                                        | ✓                                                     |
| Laboratory study | Smooth muscle antibody                                                              | ✓                                  | ✓                                        | ✓                                                     |
| Laboratory study | RNP antibody                                                                        | ✓                                  | ✓                                        | ✓                                                     |
| Laboratory study | D-dimer                                                                             | ✓                                  | ✓                                        | ✓                                                     |
| Laboratory study | Anti-phospholipid antibody                                                          | ✓                                  |                                          |                                                       |
| Laboratory study | Troponin                                                                            |                                    | ✓                                        | ✓                                                     |
| Laboratory study | N-terminal pro-brain natriuretic peptide                                            |                                    | ✓                                        | ✓                                                     |
| Laboratory study | Adrenocorticotrophic hormone and morning cortisol                                   |                                    | ✓                                        | ✓                                                     |
| Laboratory study | Hepatitis B and C testing                                                           |                                    | ✓                                        | ✓                                                     |
| Laboratory study | Parathyroid hormone                                                                 | ✓                                  |                                          | ✓                                                     |
| Laboratory study | Gamma-glutamyl transferase                                                          | ✓                                  |                                          | ✓                                                     |
| Laboratory study | Cytokine panel (IL2 receptor;                                                       | ✓                                  | ✓                                        | ✓                                                     |

| <b>Category</b>  | <b>Assessment</b>                                                    | <b>In original protocol Tier 2</b> | <b>In current protocol Tier 2 (v7.0)</b> | <b>Performed in pregnant, &lt;3 month post-partum</b> |
|------------------|----------------------------------------------------------------------|------------------------------------|------------------------------------------|-------------------------------------------------------|
|                  | IL 1beta, 2, 4-6, 8, 10, 13, 17; interferon gamma, TNF alpha)        |                                    |                                          |                                                       |
| Laboratory study | Supine and upright catecholamine testing                             | ✓                                  |                                          | ✓                                                     |
| Laboratory study | ICAM-1                                                               | ✓                                  | ✓                                        | ✓                                                     |
| Laboratory study | Insulin                                                              | ✓                                  | ✓                                        | ✓                                                     |
| Laboratory study | c-peptide                                                            |                                    |                                          |                                                       |
| Laboratory study | Oral glucose tolerance test (time points 0, 30, 60, 120 min)         | ✓                                  | ✓                                        | ✓                                                     |
| Laboratory study | Fecal WBC                                                            | ✓                                  | ✓                                        | ✓                                                     |
| Laboratory study | Fecal SARS-CoV-2 viral load (viral RNA and/or antigen)               | ✓                                  |                                          | ✓                                                     |
| Radiology        | MRI brain with gadolinium                                            | ✓                                  |                                          |                                                       |
| Radiology        | Volumetric non contrast chest CT (with inspiratory/expiratory scans) | ✓                                  | ✓                                        |                                                       |
| Radiology        | Dual energy chest CT with contrast                                   |                                    | ✓                                        |                                                       |
| Radiology        | Resting transthoracic echocardiography with strain imaging           | ✓                                  | ✓                                        | ✓                                                     |
| Radiology        | Renal ultrasound                                                     |                                    | ✓                                        | ✓                                                     |
| Radiology        | Fibroscan                                                            | ✓                                  | ✓                                        | ✓                                                     |
| Radiology        | Non-contrast abdominal CT                                            | ✓                                  |                                          |                                                       |
| Procedure        | Electrocardiogram                                                    | ✓                                  | ✓                                        | ✓                                                     |
| Procedure        | Spirometry, resting SpO2 and                                         | ✓                                  | ✓                                        | ✓                                                     |

| <b>Category</b> | <b>Assessment</b>                | <b>In original protocol Tier 2</b> | <b>In current protocol Tier 2 (v7.0)</b> | <b>Performed in pregnant, &lt;3 month post-partum</b> |
|-----------------|----------------------------------|------------------------------------|------------------------------------------|-------------------------------------------------------|
|                 | single breath diffusion capacity |                                    |                                          |                                                       |
| Procedure       | Tilt table test                  | ✓                                  |                                          | ✓                                                     |

CT: computed tomography; MRI: magnetic resonance imaging

\* The target window for performance of Tier 2 assessments is within 90 days of the date the study was triggered. Assessments not performed within that window are ineligible for completion; however, if the participant is still symptomatic and retriggers the assessment, or retriggers the assessment randomly, the study may then be performed within the new triggered window.

**S5 Table: Tier 3 Assessments**

| <b>Category</b>  | <b>Assessment</b>                                                                                                                                                                                                                                                                      | <b>In original protocol Tier 3</b> | <b>In current protocol Tier 3 (v7.0)</b> | <b>Performed in pregnant, &lt;3 month post-partum</b> |
|------------------|----------------------------------------------------------------------------------------------------------------------------------------------------------------------------------------------------------------------------------------------------------------------------------------|------------------------------------|------------------------------------------|-------------------------------------------------------|
| Examination      | Michigan Neuropathy screen                                                                                                                                                                                                                                                             | ✓                                  |                                          | ✓                                                     |
| Examination      | Utah Early Neuropathy scale                                                                                                                                                                                                                                                            | ✓                                  |                                          | ✓                                                     |
| Examination      | Complete eye examination including optical coherence tomography                                                                                                                                                                                                                        | ✓                                  | ✓                                        | ✓                                                     |
| Examination      | ENT examination                                                                                                                                                                                                                                                                        | ✓                                  |                                          | ✓                                                     |
| Examination      | Audiometry                                                                                                                                                                                                                                                                             | ✓                                  | ✓                                        | ✓                                                     |
| Examination      | Complete neurocognitive testing (to include Digit span forward/backward; Trailmaking A (3 min); Trailmaking B (3 min); Hooper Visual Organization Test, MOCA/blind MOCA, multilingual naming test, phonemic test, Benson complex figure copy, CERAD word list, Craft Story 21 Recall)+ | ✓                                  | ✓                                        | ✓                                                     |
| Examination      | Endopat testing                                                                                                                                                                                                                                                                        | ✓                                  | ✓                                        | ✓                                                     |
| Laboratory study | Serum protein immunofixation electrophoresis                                                                                                                                                                                                                                           | ✓                                  | ✓                                        | ✓                                                     |
| Laboratory study | Serum B12 with methylmalonic acid                                                                                                                                                                                                                                                      | ✓                                  | ✓                                        | ✓                                                     |
| Laboratory study | CPK, aldolase, myositis                                                                                                                                                                                                                                                                | ✓                                  | ✓                                        | ✓                                                     |

|                  |                                                        |   |   |   |
|------------------|--------------------------------------------------------|---|---|---|
|                  | panel                                                  |   |   |   |
| Laboratory study | Neurofilament light chain                              | ✓ | ✓ | ✓ |
| Laboratory study | Fecal SARS-CoV-2 viral load (viral RNA and/or antigen) | ✓ |   | ✓ |
| Laboratory study | Fecal calprotectin                                     | ✓ | ✓ | ✓ |
| Laboratory study | Total Tau (single molecule array SIMOA)                | ✓ | ✓ | ✓ |
| Laboratory study | Anti Mullerian hormone                                 |   | ✓ | ✓ |
| Radiology        | MRV/MRA brain                                          | ✓ |   | ✓ |
| Radiology        | MRI brain with gadolinium                              |   | ✓ |   |
| Radiology        | MRI cervical spine with and without gadolinium         | ✓ |   |   |
| Radiology        | MRI thoracic spine with and without gadolinium         | ✓ |   |   |
| Radiology        | MRI lumbar spine with and without gadolinium           | ✓ |   |   |
| Radiology        | Dual-energy chest CT with contrast                     | ✓ |   |   |
| Radiology        | Chest CT pulmonary angiography                         | ✓ |   |   |
| Radiology        | Ventilation/perfusion scan                             | ✓ |   |   |
| Radiology        | Cardiac imaging with meta-iodobenzylguanidine (mIBG)*  | ✓ | ✓ |   |
| Radiology        | Cardiac MRI, with and without gadolinium contrast      | ✓ | ✓ |   |
| Radiology        | Abdominal CT with contrast                             | ✓ |   |   |

|           |                                                      |   |   |   |
|-----------|------------------------------------------------------|---|---|---|
| Radiology | Gastric emptying study                               | ✓ | ✓ |   |
| Procedure | Tilt table testing with supine/upright catecholamine |   | ✓ |   |
| Procedure | Cardiovagal innervation testing                      |   | ✓ | ✓ |
| Procedure | Nerve conduction study                               | ✓ | ✓ |   |
| Procedure | Electromyography                                     | ✓ | ✓ |   |
| Procedure | Skin biopsy                                          | ✓ | ✓ |   |
| Procedure | Muscle biopsy                                        | ✓ | ✓ |   |
| Procedure | Lumbar puncture                                      | ✓ | ✓ |   |
| Procedure | Facility-based sleep study                           | ✓ | ✓ | ✓ |
| Procedure | Full cardiopulmonary exercise testing                | ✓ | ✓ |   |
| Procedure | Plethysmography lung volumes                         | ✓ |   | ✓ |
| Procedure | Bronchoscopy                                         | ✓ | ✓ |   |
| Procedure | Right heart catheterization                          | ✓ | ✓ |   |
| Procedure | Upper endoscopy                                      | ✓ | ✓ |   |
| Procedure | Colonoscopy with or without biopsy                   | ✓ | ✓ |   |

\* The target window for performance of Tier 2 and 3 assessments is within 90 days of the date the study was triggered. Assessments not performed within that window are ineligible for completion; however, if the participant is still symptomatic and retriggers the assessment, or retriggers the assessment randomly, the study may then be performed within the new triggered window.

## **S6 Table: Writing Committee**

Leora I. Horwitz  
Tanayott Thaweethai  
Shari B. Brosnahan  
Mine S. Cicek  
Megan L. Fitzgerald  
Jason D. Goldman  
Rachel Hess  
Sally L. Hodder  
Vanessa L. Jacoby  
Michael R. Jordan  
Jerry A. Krishnan  
Adeyinka O. Laiyemo  
Torri D. Metz  
Lauren Nichols  
Rachel E. Patzer  
Anisha Sekar  
Nora G. Singer  
Lauren E. Stiles  
Barbara S. Taylor



## S7 Table: RECOVER-Adult Consortium Members

### Atlanta RECOVER Clinical Research Site

#### Emory University

*Ighovwera Ofotokun, PI*

*Rachel E Patzer, PI*

Rachael Abraham

Franchesca Aguilar

Quasheba (Yasmine)

Allen

Blake Anderson

Casey Beaty

Chetna Bedi

Jasmine Berry

James Douglas Bremner

Shelby Collins

Angel Craft

D'Andrea Doyle

Jess Harding

Shilpa Krishnan

Hana Lee

Jose Daniel Leon

Dong Li

Christopher Martin

Atuarra McCaslin

Miranda Montoya

Caitlin Anne Moran

Tran Nguyen

Sofia Oviedo

ReNata Shaw

Cory Sylber

Larissa J Teunis

Kehmia Titanji

#### Emory Healthcare (Hope Clinic)

*Zanthia Wiley, PI*

Arijan Ager

Mary Atha

Mary Bower

Cartia Dixon

Rebecca Fineman

Nicole Martin Franks

Natalie Gray

Ash Grimes

Evan Gutter

Lisa Harewood

Lauren Nicole Hewitt

Christopher Huerta

Brandi Johnson

Lana Khalil

Dean Kleinhenz

Athena Koumanelis

Alexandra Koumanelis

Matthew Lee

Kennedy Lewis

Matthew Litvack

Nour Makkaoui

Eileen Osinski

Bernadine Panganiban

Dilshad Rafi Ahmed

Kazi Rahman

Paulina Alejandra

Rebolledo

Nadine Rouphael

Talib Sirajud-Deen

Veronica Smith

Andre Stringer

Jessica Traenkner

Kristen Unterberger

Kris Varney

Dongli Wang

Erika Wimberly

Terra Jean Winter

#### Grady Health System

*Tiffany Walker, PI*

Walter Asencios

Donchel Boone

Ke'Ara Brown-Smith

Jannah Elchommali

Jenny Elizabeth Han

Cynthia Ifejika

Vidhi Javia

Jerrod McIntyre

Christopher Toy

Alex Truong

Tamara Wesley

#### Morehouse School of Medicine

*Priscilla Pemu, PI*

Carmel Alvarez

Kelechi Carl-Igwe

Annette Dandy

Carla Holloway

Monica Juarez

Jan Morgan-Billinslea

Elizabeth Ojemakinde

Michael Prude

Ruvina Silva

Cheryl Simpson

Ashley Sylvera

#### Atlanta VA Health Care System

*Sushma Komakula*

*Cribbs, PI*

Ghazal Ahmadi-Izad

Alicarmen Alvarez

Gustavo Capo

Erna Clyburn

Julie Costello

Xiangqin Cui

Rijalda Deovic

Jeanne Dow

Anyssa Francis

Julia Gallini

Liliana Hernandez

Ketteria Ingram

Jordi Lainez

Vincent Charles Marconi

Loice Mbogo

Abeer Moanna

Elena Morales

Yolanda Paredes-Gaitan

Chantrice Rogers

Tehquin Tanner

Kodasha M Thomas

Kartavya Vyas

Juton Winston

Cherry Wongtrakool

#### Kaiser Permanente of Georgia

*Jennifer C. Gander, PI*

Patricia Bush

Jamila Johnson

Imanii Kolailat

Monica Martinez

Roslin Nelson

Robert B Neuman

Bukkie Ojoawo

Marni Segall

#### Boston COVID-19 Recovery Cohort

**Brigham and Women's  
Hospital**

*Bruce Levy, PI*

Nya Alexander  
Lindsey Baden  
Shamik Bhattacharrya  
Julie Buring  
Li Qing Chen  
Cheryl Clark  
Charles Czeisler  
Lauren Donahue  
Elizabeth Gay  
Sheila Hegde  
Adetoun Okenla  
Bisola Ojikutu  
Daniela Lamas  
Kwabena Lartey  
Nomi Levy-Carrick  
Maureen Macgowan  
Karen Magsipoc  
JoAnn Manson  
Susan Redline  
Elizabeth Sampson  
Haley Schram  
Howard Sesso  
Scott Solomon  
Jeffrey Sparks  
Maria Sundquist  
David Systrom  
Vivian Thu  
David Walt  
George Washko  
Rebecca Weiner  
Maureen Whittelsey

**Massachusetts General  
Hospital**

*Ingrid V. Bassett, PI*

George Alba  
Galit Alter  
Jasneet Aneja  
Francesca Caramazza  
Geoffrey Chen  
Lilly Fernandes  
Sarah Flannery  
Mabelin Garcia De La  
Rosa  
Joseph Giacino  
Leo Ginns  
Marcia Goldberg

Colin Goodbred  
Jennifer Haas  
Stephanie Horsfall  
Surabhi Iyer  
Elena Jin  
Michelle Jones  
Boris Juelg  
Diane Kanjilal  
Arthur Kim  
Jodi Kurtz  
Gregory Lewis  
Valeria Magallan  
Kristin Meader  
Winna Mowenn  
Taing Nandi Aung  
Daniel Pacella  
Roy Perlis  
Jonathan Rosand  
Ashley Stuckwisch  
Anisha Tyagi  
Zachary Wallace  
Dean Xerras  
Danielle Zionts

**Beth Israel Deaconess  
Medical Center**

*Janet Mullington, PI*

Toluwanimi Ajayi  
David Alsop  
Esther Apraku  
Michelle Beck  
Diara Canton  
Ai-Ris Collier  
Andrea Collins  
Rammy Dang  
Sourbha Dani  
Ramona Faris  
Tamara Fong  
Wilanda Gabriel  
Sarju Ganatra  
Monika Haack  
Halle Hall  
Kristine Hauser  
Wendy Hori  
Matcheri Keshavan  
Elizabeth LaSalvia  
Andrew Lewis  
Chun Lim  
Jason Maley  
Edward Mercantonio  
Murray Mittleman

Rita Monahan  
Keishi Nambara  
Emily Peachthong  
Yuri Quintana  
Uyen Rasphoumy  
Marjorie Rowe  
Jennifer Scott-Sutherland  
Lynn Shaughnessy  
Kathryn Stephenson  
Jennifer Stevens  
Gyongyi Szabo  
Andrew Taylor  
Siline Thai  
Robert Thomas  
Michael Vazquez  
James Wareing  
Huan Yang  
Oscar Yang

**Boston  
University/Boston  
Medical Center**

*Jai Marathe, PI*  
Tracy Battaglia  
Anna Cervantes-  
Arslanian  
Elizabeth Duffy  
Naomi Hamburg  
Misaki Kobayashi  
George O'Connor  
Fitzgerald Shepherd  
Charles Williams

**Cambridge Health  
Alliance**

*Janice John, PI*  
Pieter Cohen  
Geetika Gupta  
Margaret Lanca  
Amberly Ticotsky

**Tufts Medical Center**

*Michael Jordan, PI*  
*Honorine Ward, PI*  
Rebecca Badore  
Deborah Blazey-Martin  
Renee Brody  
Maher Ghamloush  
Vidya Iyer  
Laura Kogelman  
Marvin Konstam

Bipin Malla  
Olaniyi Ogundobede  
Debra Poutsiaka  
Rupali Ranade  
Dulia Santos  
Paul Summergrad  
David Thaler  
Lauren Tobias

**South Shore Hospital**

*Frank Schembri, PI*  
Paola Castellotti  
Carolyn McLaughlin  
Justin O'Leary  
Simone Wildes

**Deep South SARS-CoV-2  
Recovery Cohort**

**University of Alabama  
at Birmingham**

*Jeanne Marrazzo, PI*  
*Nathan Erdmann, mPI*  
*Emily Levitan, mPI*  
Donna Armstrong  
Kenneth Blackwell III  
Annalia Causey  
Felice Cook  
Julio Domingo  
Conner Donahue  
Maitlyn Eady  
Jeffrey Edberg  
Susan Ellen Binkley  
Melissa Garner  
Brandon Gray  
Wanda Hall  
Cady Hart  
Bertha Hidalgo  
Kaylen Holtzapfel  
Alexis Jinright  
Suzanne Judd  
Teri Kennedy  
Leigh Kirkwood  
Megan Maier  
Patricia McCormack  
Kevin Mitchell  
Aoyjai Montgomery  
Juan Pablo Pilco  
Leigh Powell  
Rachael Shevin  
Sidney Skipworth

Leah Spurgeon  
Gregory Ware  
Rosanne Wilson  
Dana Woodruff

**University of South  
Alabama**

*Mark Gillespie, PI*  
Noah Garcia-McClaney  
Jamie Hansel  
Jing Wu

**University Medical  
Center New Orleans**

*Jyotsna Fuloria, PI*  
Paula Datri  
Michael Hagensee  
Cathryn Leggio  
Allen Perkins  
Amber Trauth  
Siobhan Trotter  
Alexander Van Deerlin  
Sharon Weiser  
Madeline Young

**Louisiana State  
University**

*Lucio Miele, PI*  
Todd Brown  
Erica Sutherland

**Howard University**

**Howard University**

*Hassan Ashktorab, PI*  
*Hassan Brim, PI*  
*Adeyinka Laiyemo, PI*  
*Zaki Sherif, PI*  
Emmanuel Baidoo  
Chioniso Jakazi  
Alem Mehari  
Julius Ngwa  
Monique Perret Gentil  
Ruth Quartey  
Akbar Solemani

**University of Maryland  
Mercy Medical Center  
(UMD-MC)**

*Paul Thuluvath, PI*  
*Anurag Maheshwari, PI*

Mhret Alemu  
Jordan Anderson  
Mahak Chauhan  
Sung Cho  
Karli Goodman  
Gandi Lanke  
Ralph Lebron  
Jina Ok  
Polly Robarts  
Somya Shesadri  
Chau To  
Hwan Yoo

**IDEA States Consortium  
for Clinical Research  
(ISCORE)**

**West Virginia**

**University**

*Sally Lynn Hodder, PI*  
James Bardes  
Connie Cerullo  
Michelle Chidester  
Renee Clark  
Sherri Davis  
Cynthia Duda  
Chad Glaze  
Cami Handlan  
Paige Harman  
Shelly Howenstein  
Karen Hunter  
Shruti Jaiswal  
Joy Juskowich  
Wesley Kimble  
Stacey Koontz  
Tanya Moran  
Anne Oravets  
Rebecca Reece  
Meghan Reeves  
Zhili (Julie) Shao  
Shelley Welch  
Haixia Tracy Yang  
Suhil Zia

**Hispanic Alliance for  
Clinical and  
Translational Research**

*Carlos A. Luciano, PI*  
Aracelis Arroyo  
Ileana Boneta

Daniel Casiano  
Sylvia Davila  
Nilda Gonzalez  
Marielly Lopez  
Carola Lopez-Cepero  
Roman  
Mariela Maisonet-  
Alejandro  
Rene Marty  
Mary Mays  
Yaritza Moran  
Litza N Pabon Malave  
Sigrid Perez Frontera  
Adelma Rivera  
Ana C. Sala Morales  
Waleska Sanchez-  
Vazquez  
Jorge Santana  
Ruth Santos

**LSU Health Sciences  
Center New Orleans**

*Judd Shellito, PI*  
Holli Bologna  
Virginia Garrison  
Erin Meyaski  
Mary Meyaski-Schluter

**LSU Pennington  
Biomedical Research  
Center**

*John P. Kirwan, PI*  
Kimberly Banks  
Emily Rachal  
Emily Bebler  
Grace Bella  
Alexa Bennett  
Erica Bertrand  
Kara Devall  
Gabriela Dominguez  
Amber Dragg  
Angela Eldredge  
Elisabeth Fontenot  
Greta Fry  
Bethany Gildersteeve  
Sara Goff  
Frank Greenway  
Lauren Harrington  
Erin Herrin  
Lisa Jones  
Erin King

Leigh Lamonica  
Stephen Lee  
Yejee Lee  
Robert Leonhard  
Jennifer Levatino  
Donald Lewis  
Melissa Lingle  
Angrielle Lloyd  
Raoul Manalac  
Brian Melancon  
Carla Milo  
Ronald Monce  
Blair Pucheu  
Jennifer Rood  
Stacey Roussel  
Connor Sanford  
Monica Santos  
Crissy Sharpe  
Mandy Shipp  
Brooklyne Smith  
Aryelle Stafford  
Amy Thomassie  
Celeste Waguespack  
Katherine Walgamotte  
Aubrey Windham

**MaineHealth/Northern  
New England IDEA  
CTR**

*Clifford J. Rosen, PI*  
Abigail Arruda  
Emily Berg  
Anne Breggia  
Kathryn Brouillette  
Ivette F. Emery  
Marc Flore  
Lindsey Gower  
Teresa Martel  
Lauren Moore  
Darlene Peterson  
Theresa Roelke  
David Seder

**Sanford Health**

*Marc D. Basson, PI*  
Nicole Arbach  
Lora Black  
Reagan Byrum  
Susan Hoover  
Jessica Just  
Lindsay Krause

Debra Langstraat  
Allison Lutz  
Sara Onnen  
Vanessa Williams

**Tulane School of  
Medicine**

*Vivian Fonseca, PI*  
Emily Callegari  
Shaveeta Gupta  
Elvia Haynes  
Roxanne Johnson  
Neda Khoshkhoo  
Brian Logarbo  
Michele Longo  
Sofia Marquez  
Roberta McDuffie  
Arianna Mohiuddin  
Dynte Moore  
Ahona Mukherjee  
Aneisha Simon  
Monica Smith  
Neha Upadhyay  
Blaire Williams  
Mei Yang

**University of  
Hawaii/Mountain West  
CTR**

*Cecilia M. Shikuma, PI*  
Dominic Cheung Chow  
Boonyanudh Jiyarom  
Bradley Mak  
Eduardo Manzano  
Grace Matsuura  
Cris Milne  
Lorna Nagamine  
Debbie Ogata-Arakaki  
Rachel Ouye  
Victoria Rivera  
Zao Zhang

**University of Kansas  
Medical Center**

*Mario Castro, PI*  
Charles Bengtson  
Chris Bessmer  
Luigi Boccardi  
Jonathan Boomer  
Maggie Chen  
Kenton Felmlee

Theresa Howard  
Jaehun Jeong  
Kathy Jurius  
Pamela Kemp  
Christina Pantalunan  
Tyler Re  
Adam Ruff  
Betina Senat  
Leah Seymour  
Leslie A. Spikes  
Jennifer Troyer  
Vanessa Verschelden  
Vianca Williams

**University of Kentucky**

*Sidney Waldo*  
*Whiteheart, PI*  
Hammodah Alfar  
Suzanne Arnold  
Laura Ashe  
Marietta Barton-Baxter  
Ryleigh Board  
Suzanne Burchett  
John Peyton Bush  
Beth Garvy  
Olivia Hage  
Ellen Hartman  
Darren Henderson  
Melissa Hollifield  
Frazier Moore  
James Zachary  
Porterfield  
Martha Sim  
Ryan Weeks  
Jeremy Wood

**University of  
Mississippi Medical  
Center**

*Gailen Marshall, PI*  
Robert Brodell  
Jamie Brown  
Donielle Drakes  
Vishnu Garla  
Sarah Glover  
Michael Hall  
Thomas Hudson  
Kia Jones  
Christopher Moore  
Rachel Morris  
Utsav Nandi

Kelsey Napper  
Bhagyashri D. Navaleke  
Leila Seidfaraji  
Shashank Shekar  
John Spurzem  
Amy Wigglesworth

**University of Nebraska  
Medical Center**

*Andrew Vasey, PI*  
Amira Abdus-Salaam  
Karen Blessing  
Daniel Copeland  
Kristi DeHaai  
John D Dickinson  
Irena Kovacevic  
LuAnn Larson  
Tracy Mathisen  
Marah Miller  
Kristen Nickolas  
Katie Ostlund  
Mary Peguero  
Vaishali Phatak  
Alex Reed  
Maria Thurow  
David E. Warren  
Sara Warta  
Koreen Wede  
Abigail Zatkalik

**University of Oklahoma  
Health Sciences Center**

*Judith A. James, PI*  
*Timothy VanWagoner, PI*  
Cristina Gale Arriens  
Amanda L. Bogie  
Cathy Carmichael  
Brittany Karfonta  
Geneva Marshall  
Tiffany Moore  
Valorie Owens  
James Scott  
Fatima Sukhera  
Timothy Walsh  
Drake Williams

**ILLnet**

**University of Illinois  
Hospital & Clinics**

*Jerry A Krishnan, PI*

Neha Atal  
Aileen Baker  
Sunni Barbera  
Rachel Beety  
Daksh Bhargava  
Andrew D. Boyd  
Taylor Breiter  
Elizabeth Calhoun  
Ruby Camacho  
Michael Carrithers  
Lauren Castro  
Gabrielle Cavaliere  
Rashmika Chalamalla  
David Chestek  
Tabitha Chettupally  
Judith A. Cook  
Dawood Darbar  
Raktima Dasgupta  
Marina Del Rios  
Julie DeLisa  
Sai Dheeraj Illendula  
Kathleen Diviak  
Tara Driscoll  
Mark Steven Dworkin  
Angela M. Ellison  
Clarie Flanigan  
Meghan Fortune  
Meghan Fortune Donlon  
Divya Francis  
Michael Freedman  
Lynn Gerald  
Wayne H. Giles  
Bayan Hammad  
Sharon Hasek  
Wendy Hasse  
Maryann Holtcamp  
Martyrna Hryniewicka  
Bryan Huerta  
Nina Huynh  
Niha Idrees  
Nahed Ismail  
Akash Jain  
Kyle Jennette  
Shrinidhi Kadkol  
Grace Kadubek  
Denise Kent  
Jonathan D. Klein  
Lucia Large  
James Lash  
Michele Ledbetter  
James Lee

Cynthia Leman  
Jun Lu  
Miriam Martinez  
Cammeo Mauntel-Medici  
Amy McManus  
Conny Mei  
Martha Menchaca  
Robin J. Mermelstein  
Tennessee Miller  
Abeer Mohamed  
David Moreno  
Liam Morrissy  
Naoko Muramatsu  
Hugh Musick  
Lourdes Norwick  
Richard M. Novak  
Elizabeth Ochoa-Raya  
John O'Keefe  
Abigail Olsen  
Khushboo Patel  
Nicolas Perez  
Neil Pliskin  
Erin Pozzolano  
Bellur S. Prabhakar  
Bharati Prasad  
Barbara Predki  
Heather M. Prendergast  
John G. Quigley  
Ramaswamy  
Ramchandran  
Sarah Rappe  
Ann Roach  
Matthew Rowley  
Gowrisree Rudraraju  
Melissa Rutherford  
Jason Scheer  
Tina Schuh  
Jennifer Sculley  
Nancy Shapiro  
Jerisha Smith-Mack  
Lauren Speakman  
Nancy Tartt  
Angela Tobin  
Ellen Uppuluri  
Melissa Uribe  
Terry L. Vanden Hoek  
Laura Villanueva  
Ceolamar Ways

**BrightStar Community  
Outreach**

Kathy Cullick  
Pastor Chris Harris  
Carl Hearne  
Joani Vaughan  
Erron Williams

**Chicago Urban League**

Calmetta Coleman  
Lela Olds

**Envision**

Adriana Mateo  
Jennifer Ramirez

**Illinois Unidos**

Lisa Aponte-Soto  
Javier Arellano  
Maya Diaz  
Hilda Garcia  
Saira Garcia  
Alejandra Ibañez  
Marilyn Ortiz  
Cesar Rolon  
Maite Zapata

**Mile Square Health  
Centers**

*Janet Y. Lin, PI*  
Judes Fleurimont

**OSF Healthcare/St.  
Francis Medical Center**

*John Hafner, PI*  
Isidra Baker  
Jennifer Bandy  
Dawn Bolliger  
Praneeth Chebrolu  
Jennifer Dixon  
Michael Downey  
Lisa Gale  
Keith Hanson  
Kimberly Hartwig

**Peoria City/County  
Health Department**

Monica Hendrickson  
Seth Noland  
Tracy Terlinde

**Teamwork Englewood**

Brianna Hobbs

**UI College of Medicine  
Peoria**

*Sarah Donohue, PI*  
Sara Kelly  
Jerusha Boyineni  
Hannah Curry  
Sherrie Edmonds  
Phoebe Maholovich  
Sergey Malchenko  
Sarah Stewart de  
Ramirez  
Tiffany Thompson

**UnityPoint Health**

*Samer Sader, PI*  
Savannah Cranford  
Terri Osmulski  
Praveen Sudhindra

**Mount Sinai PASC  
Coalition (SinaiPACT)**

**Icahn School of  
Medicine at Mount  
Sinai**

*Alexander Charney, PI*  
*Girish Nadkarni, PI*  
*Juan Wisnivesky, PI*  
Rawan Abdel Galil  
Taj Adams  
Steven Ascolillo  
Esther Assenso  
Emilia Bagiella  
Jacqueline Becker  
Kirk Campbell  
Adrien Canery  
Erica Cha  
Esther Cheng  
Dayeon Cho  
Alyssa Civil  
Carlos Cordon-Cardo  
Chase Gornbein  
Kaberi Dhar  
Andrew Draheim  
Jeremiah Faith  
Zahi Adel Fayad  
Brian Fennessy  
Kaleigh Fidaleo  
Sacha Gnjjatic

Caroline Goldstein  
Ruchir Goswami  
Malika Gregory  
Sabina Guliyeva  
Lori Harvey-Ingram  
Carol Horowitz  
Rachel Jackson  
Minal Kale  
Matthew Hill  
Jillani Kamran  
Seunghye Kim-Schulze  
Srisundesh Kodali  
Jonathan Koganov  
Amy Kontorovich  
Patricia Kovatch  
Jennifer Kucera  
Jenny Lin  
Inna Lishchenko  
Martina Lopez May  
Kathryn Marcon  
Robert Marvin  
Megan McVeety  
Miriam Merad  
Dara Meyer  
Janice Morinigo  
Khadeja Moses  
Maya Nussenzweig  
Cindy Osei  
Tiffani Padua  
Anisha Pal  
Louis Pasquale  
Vibhuti Patel  
Farah Rahman  
Michelle Ramos  
Lynne Richardson  
Leah Samuels  
Jewelle Schofield  
Joyce Serebrenik  
Abdullah Serri  
Nicole Simons  
Sarah Tsuruo  
Akosua Twumasi  
Jaclyn Verity  
Einab Weingarten  
Alexis Whitaker  
Lillian Wilkins  
Michell Yee  
Kimia Ziafat

## **Mountain States PASC Collaborative**

### **University of Utah**

*Rachel Hess, PI*  
Haddy Bah  
Macy Barrios  
Conner Beckstead  
Grayson Charlton  
Dagny Donohue  
Amanda Edwards  
Julio Facelli  
Isaac Ford  
Dylan Freston  
Reese Gorey  
Tina Greimes  
Paul Hartman  
Ainsley Huffman  
Alfonso Lopez  
Juliemar Medina  
Sophia Perez  
Tristan Planelles  
Jenny Powell  
Annie Risenmay  
Laura Scarborough  
MaryBeth Scholand  
Suzanne Vernon

### **Denver Health and Hospital Authority**

*Edward M. Gardner, PI*  
Tanner Bryan  
Kaitlin Buck  
Kellie Hawkins  
Amy Irwin  
Judy Oakes  
Cole Ossian

### **Intermountain Healthcare**

*Kirk Knowlton, PI*  
Bailee Aguirre  
Jeff Anderson  
Kayelee Auer  
Tami Bair  
Lindsay Bosh  
Lorlie Evans  
Chase Garrett  
Dixie Harris  
Katherine Herrera  
Eliotte Hirshberg

Ben Horne  
James Juan  
Stacey Knight  
Lindsay Leither  
Heather Maestas  
Heidi May  
Gabriel Najarian  
Darija Runjaic-Ward  
Scott Woller  
Shyanne Zubal

### **University of Colorado Anschutz Medical Campus**

*Kristine Mace Erlandson,  
PI*  
Natasha Altman  
Jill Bastman  
Nick Charron  
Jamie Cronin  
Jesse Cwik  
Elen Feuerriegel  
Lani Finck  
Adit Ginde  
Paige Graham  
Amy Harjes  
David Huynh  
Brandon Johnson  
Sarah Elizabeth Jolley  
Marjorie McIntyre  
Jeffrey McKeehan  
Aaron Mobley  
Sarah Montoya  
John Nguyen  
Priscilla Pando  
Kayleigh Reid  
Ron J. Sokol  
Shelby West

### **University of New Mexico Health Sciences Center**

*Hengameh Raissy, PI*  
David Archuleta  
Rebecca Brito  
Elyce Sheehan  
Noella Garcia-Soberanez  
Frederick Gentry  
Eve Gronert  
Michelle Sue Harkins  
Debbie Lovato

Noah Martinez  
Lorenzo Montoya  
Alisha Parada  
Davin K. Quinn  
Alfredo Ramos  
Irena Treacher

**NorthEast Ohio Covid  
United for REcovery  
(NEO-CURE)**

**Case Western Reserve  
University/University  
Hospital**

*Grace McComsey, PI*  
Sadeer Al-Kindi  
Rita Abbud  
John Andrefsky  
Alexis Baloi  
Nicholas Boldt  
Melinda Caraballo  
Mary Chong  
Kathryn Clark  
Ann Conrad  
Mary Consolo  
Rebecca Curtis  
Lynette Curtis  
Margaret Clapp  
Brian D'anza  
Sarah Dawson  
Kathryn DiFrancesco  
Jared Durieux  
Ebenezer Eteshola  
Jihane Faress  
Michelle Gallagher  
Olivia Giddings  
Paul Harris  
Carla Harwell  
Carla Hernandez  
Shirin Iqbal  
Olivia Kennedy  
Danielle Labbato  
Antonio Levert  
Jennifer Levin  
Angelica Levreault  
Christian Mouchati  
Caleb Mavar  
Keely Newson  
Princess Ogbogu  
Morgan Pulling

Laura Puskas  
Amanda Rivera  
Michael Rodgers  
Theresa Rodgers  
David Rosenberg  
Arnab Roy  
Sarah Scott  
Niyati Sheth  
Beth Smith  
Megan Tribout  
George Yendewa  
David Zhang  
Sokratis Zisis

**The MetroHealth  
System**

*Nora Singer, PI*  
Mohammed Abuzahrieh  
Mirna Ayache  
Emma Barnboym  
Hailey Chesnick  
Marissa Edminston  
Lorraine Gordesky  
Carla Greenwood  
Maricela Haghiac  
Elizabeth Kaufman  
Rebecca Lowenthal  
Ketrin Lengu  
Bridget Mackin  
Shahdi Malakooti  
Judy Minium  
Christine Oleson  
Ann Pearman  
Kris Russ  
Cheryl Smith  
Terry Stancin  
Daniel Temple  
Elisheva Weinberger

**The Pacific Northwest  
Consortium for Post-  
Acute Sequelae of SARS-  
CoV-2 Infection**

**Institute for Systems  
Biology**

*James Richard Heath, PI*  
Conor Brennan  
Rick Edmark  
Simon Evans

Vanessa Gutierrez  
Jennifer Hadlock  
On Ho  
Kathleen Jade  
Sarah Li  
Andrew T. Magis  
Michaela McKasson  
Lee Rowen  
Thea Swanson  
Dan Yuan

**Cedars-Sinai Medical  
Center - Los Angeles,  
CA**

*Peter Chen, PI*  
Antonina Caudill  
Susan Jackman  
Brittany Mattison  
Sam Torbati

**Providence Regional  
Medical Center Everett**

*George Diaz, PI*  
Angela Berrios  
Jerome Differding  
Vanessa Elan  
Keely Heredia  
Nasiha Hussain  
Jo Joslin  
Courtney Rinehart  
Rebecca Watson

**Providence Sacred  
Heart Medical Center**

*Katherine Tuttle, PI*  
Radica Alicic  
Joni Baxter  
Lisa Davis  
Sarah Emerson  
Claudia Flores  
Susan Hood  
Kelli Kuykendall  
Allison Lambert

**Swedish Health  
Services/ISB/Swedish  
Medical Center**

*Jason D. Goldman, PI*  
Heather Algren  
Aaron Ayenew  
James Del Alcazar



Allie Duven  
Stephanie Johnson  
John Kaneko  
Christina Kim  
Paula Manner  
Marisa McCormack  
Tija Tippett  
Julie Wallick  
Natalie Young

**University of  
Washington**

*Helen Y. Chu, PI*

Eric Chow  
Nicholas Franko  
Emily Guthrie  
Megan Kemp  
Jennifer Logue  
Denise McCulloch  
Dylan McDonald  
Callista Nackviseth

**PREVAIL South Texas**

**University of Texas  
Health Science Center  
at San Antonio**

*Thomas F. Patterson, PI*

*Barbara S. Taylor, PI*

Reed Anderson  
Azaneth Arellanes  
Rose Ann Barajas  
Cheryl Farner  
Melinda Fischer  
Mark P. Goldberg  
Monica Verduzco-  
Gutierrez  
Gabrielyd Hastings  
Patricia Heard  
Italia Herrera  
Edgar Infante  
Lisa Longoria  
Hillary Johnson  
Johnnie Jones  
Emeka Okafor  
Jan Evans Patterson  
Alexis Pinones  
Jennifer Potter  
Brian Reeves  
Irma Scholler  
Sudha Seshadri

Dimpy Shah  
Pankil Shah  
Bridgette Soileau  
Pamela Solis  
Carmen Stoebner  
Michael Sullivan  
Robin Tragus  
Joel Tsevat

**UT Education and  
Research Center at  
Laredo**

*Claudia Castillo*

*Paredes, PI*

Stephanie Alvarado

**Stanford Post-Acute  
Recovery Cohort  
(SPARC)**

**Stanford University**

*Upinder Singh, PI*

*Paul Utz, PI*

Aubrey Adio  
Neera Ahuja  
Shuchi Anand  
Leonard Basobas  
Catherine Blish  
Andra Blomkalns  
Jenna Bollyky  
Hector Bonilla  
Athanasia Boumis  
Richard Brotherton  
Kimberly Clinton  
Liisa Dewhurst  
Vaidehi Dingankar  
Julia Donahue  
Jorge Doranets  
Jinelle Fields  
Linda Geng  
Rojin Ghobadi  
JaVahn Iverson  
Karen Jacobson  
Prasanna Jagannathan  
Yasmin Jazayeri  
Kathryn Jee  
Jaliza Johnson  
Celeste Jupiter  
Ryan Kelley  
Naresh Khurana

Charity Kim  
Andre Kumar  
Amy Kuo  
Jamison Langguth  
Kharma Lhamo  
Martina Madrigal  
Chaitasi Majmudar  
Yvonne Maldonado  
Lisa Maredia  
Ellen O'Connor  
Nicole Odenwald  
Andrew T. O'Donnell  
Divya Pathak  
Rinoka Sato  
Allyson Tayag  
Crystal Ton-Nu  
Mary Rithu Varkey  
Anita Visweswaran  
Samuel Yang

**Stanford Tri Valley**

*Minjoung Go, PI*

Christopher Jamero  
Xiaolin "Kathleen" Jia  
Kelly Olszewski  
Orlando Quintero  
Jake Scott

**United Against COVID -  
AZPC3 Consortium**

**University of Arizona**

*Janko Nikolich-Zugich, PI*

*Sairam Parthasarathy, PI*

Carly Deal  
Rodriguez Esquivel  
Denise  
Isabella DuPre  
Kacey C. Ernst  
Lunar Far  
Lucia Felix  
Mariana Felix  
Angelica Galdamez-  
Avila  
Amanda E Galster  
Omar Gomez  
Edgar Gutierrez  
David T. Harris  
Stefanie Harris

Adrianna Hernandez  
Michael Hernandez  
Maria Karnafel  
Colleen Kenost  
Maria Khawam  
Alison Koleski  
Suhr Kyle  
Bonnie LaFleur  
Brenda Lambert  
Sicily LaRue  
Ryan Lee  
Kylie Lew  
Karen Lutrick  
Nirav Merchant  
Christopher Morton  
Sabrina OesterleHas  
Toluwanimi Olorunnisola  
Courtney L Olson  
Jeanette Peralta  
Iliana Perez  
William (Vern) Pilling  
Kristen Pogreba-Brown  
Eric Reiman  
Denise Rodriguez  
Esquivel  
Megan Rumble  
T. Lee Ryan  
Erick Sanchez  
Maria Santa Cruz  
Terry Smith  
Manuel Snyder  
Vignesh Subbian  
Kyle Suhr  
Nancy K. Sweitzer  
Annie Van Den Broeke  
Deanna Velarde  
April Yingst

**Banner University  
Medical Center  
(BUMC) Phoenix**

*Joyce Lee-Iannotti, PI*  
Lynn Autry  
Sabine Borwege  
Maura Carriel  
Jacquelynn Copeland  
Marjorie DiLise-Russo  
Susan Fadden  
Marilyn Glassberg  
Isaias Gomez  
Garrett Grischo

William Hartley  
Leah Hillier  
Harvey Hsu  
Hira Ismail  
Stephanie Iusim  
Michelle James  
Mrinalini Kala  
Erika Kenney  
Daniel Kim  
Kenneth S. Knox  
Melanie MacNevin  
Nicole Marshall  
James Michelle  
Ganesh Murthy  
Jami Ochoa  
Fatima Palacios  
Elizabeth Quijada  
Elizabeth Rawnsley  
Elizabeth Russo  
Christina Sosa  
Samuel Unzek  
Sheila Vadovicky  
Sharry Veres

**Banner University  
Medical Center  
(BUMC) Tucson**

*Eric M. Reiman, PI*  
Maria Ambrose  
Christian Bime  
Joy Elizabeth Bulger  
Beck  
Tiffanie Cagle  
Austin Derma  
Margaret Drury  
Damien Duran  
Jose Elizondo  
Rebecca Foley  
Brent Gary  
Claudia Gonzales  
Lillian Hansen  
Trina Hughes  
Ayesha Javed  
Elizabeth Juneman  
David Lieberman  
Margaret McCann  
Jarrod Michael Mosier  
Katie Raymer  
Nikki Reed  
Franz Rischard  
Tanya Sandhu

Francisco Soto  
Carlos Tafich-Rios  
Uma Reddy  
Cathleen Wilson

**Mayo Clinic Scottsdale**  
Chyke Abadama  
Doubeni

**University of California  
San Francisco**

**University of California  
San Francisco**

*Steven Deeks, PI*  
*Dan Kelly, PI*  
*Jeffrey Martin, PI*  
*Michael Peluso, PI*  
Khamal Anglin  
Urania Argueta  
Kofi Asare  
Amethyst Belanger  
Melissa Buitrago  
Aimee Cantoran  
Celina Chang Song  
Alexus Clark  
Nicole Del Castillo  
Monika Deswal  
Matthew Durstenfeld  
Halle Grebe  
Timothy Henrich  
Rebecca Hoh  
Priscilla Hsue  
Beatrice Huang  
Billy Huang  
Rania Ibrahim  
Pamela Josue  
Marian Kerbleski  
Raushun Kirtikar  
Salman Mahboob  
Sadie Munter  
James Lombardo  
Monica Lopez  
Michael Luna  
Carina Marquez  
Lynn Ngo  
Randy Parada  
Kimberly Rhoads  
Antonio Rodriguez  
Alma Rodriguez Lopez  
Justin Romero

Dylan Ryder  
Matthew So  
Viva Tai  
Brandon Tran  
Daisy Valdivieso  
Deepshika Verma  
Meghann Williams  
Andhy Zamora

**Adult Pregnancy  
Cohort  
PRIORITY: Post-Acute  
Sequelae of SARS-CoV-2  
in Pregnant Women and  
their Children**

**University of California  
San Francisco**  
*Vanessa Jacoby, PI*  
Nyat Araya  
Cinthya Arellano-  
Melchor  
Ann Chang  
Isabel De La Torre  
Soujanya Gade  
Estefania Guerreros  
Victoria Laleau  
Vanessa Monzon  
Marie Salem  
Maria Tolentino

**MFMU PASC-PREG**

**University of Utah**  
*Torri Metz, PI*  
Brynlee Buhler  
Noah Carson  
Jacob Draper  
Kevin Duff  
Marie Gibson  
Denise Lamb  
Amanda Nelsen  
Shannon Schlater  
Amber Sowles  
Cassandra Vance

**Brown University  
(Women and Infants  
Hospital)**  
Marshall Baez

Lisa Beati  
Donna Catlow  
Angelica DeMartino  
Shafaq Jawed  
Diana Kuhn  
Haley Lefebvre  
Paula Lorenzi  
Jane Milano  
Stephanie Nunez  
Amanda O'Neill  
Athena Poppas  
Dwight Rouse  
Janet Rousseau

**Case Western -  
MetroHealth Medical**

*Jennifer Bailit, PI*  
*Kelly Gibson, PI*  
Wendy Dalton  
Brittany DeSantis  
Bailey Diaz  
Parmjit Gill-Jones  
Melissa Kinas  
Joan Lippus  
Brian Mercer  
Judi Minium  
Abigail Pierser  
LuAnn Polito  
Ava Reese  
Eugenia Sweet

**ChristianaCare**

*Matthew Hoffman, PI*  
Caitlin Almeida  
Carrie Kitto  
Shannon Traczykiewicz  
Ashley Vanneman

**Columbia University**

*Uma Reddy, PI*  
Sabine Bousleiman  
Sheica Cedano  
Sara Echeverri  
Megan Loffredo  
Rupa Ravi  
Noelia Zork

**Duke University  
Medical Center**

*Brenna Hughes, PI*  
Nixaliz Cumba

Jennifer Ferrara  
Lena Fried  
Danielle Lanpher

**The George  
Washington University**

*Rebecca Clifton, PI*  
Katia Barrett  
Greg Sandoval  
Steven Weiner

**Good Samaritan**

*Mounira Habli, PI*  
Marta McClellan  
Beth Sears

**Medical College of  
Wisconsin**

*Anna Palatnik, PI*  
Mariana Karasti  
Johanna Kessel  
Christina Meyer  
Eleanor Saffian

**Miami Valley Hospital**

*Samantha Wiegand, PI*  
Kathleen Fennig  
David McKenna  
Emily Reynolds  
Esther Kaye Snow  
Rebecca Wirth

**New York-  
Presbyterian/Queens**

*Daniel Skupsk, PI*  
Giorgi Kvashilava  
Roselyn Chan-Akeley  
Sara Lucia Echeverri  
Andrea Perez  
Kelly Zhou

**NorthShore University  
HealthSystem**

*Beth Plunkett, PI*  
Kevin Hascher  
Dina Kapogiannis-Politis  
Kathy Kearns  
David Ouyang  
Sunitha Suresh  
Arebah Waseem

**Northwestern  
University**

*Lynn Yee, PI*  
Dequana Jones  
Gail Mallett  
Audrey McMahon  
Emily Miller  
Mercedes Ramos  
Trista Reynolds  
Isabel Uribe

**Ohio State University**

*Maged Costantine, PI*  
Anna Bartholomew  
Stephanie Brindle  
Barbara Cackovic  
Sommer Chaney  
Dawn Cline  
Alyson Johnson  
Baylee Klopfenstein  
Huban Kutay  
Devra Mast  
Kayla McDaniel  
Alexis Neri  
Melanie Paglione  
Sounali Perez  
Sydney Rentsch  
Jessica Russo  
Taryn Summerfield  
Yan Yuan  
Mark Landon  
Stephen Thung  
Cynthia Shellhaas  
Michael Cackovic  
Heather Frey  
Kara Rood  
Patrick Schneider  
Kartik Venkatesh  
Courtney Abshier-Ware  
Erin Cleary  
Jennifer Grasch  
Miranda Kiefer  
Mahmoud Abdelwahab  
Joe Eid  
Monique McKiever  
Sophia Andreatta  
Christine Field  
Caroline Bank  
Xiao-yu Wang  
Olivia Starcher

**Saint Peter's University  
Hospital**

*Kristy Palomares, PI*  
Imene Beche  
Danielle Graziano-  
Carrete  
Clara Perez  
Molly Sklios

**University of Alabama  
at Birmingham**

*Alan Tita, PI*  
Nitin Arora  
Kenneth Max Blackwell  
Mariela Blair  
Nicole Burrell  
Lisa Dimperio  
Donna Dunn  
Janatha Grant  
Madison Mann  
Myriam Peralta  
Lakia Pettibone  
Jhana Plump  
Jawan Struggs-Jemison

**University of Colorado**

*Camille Hoffman, PI*  
Jocelyn Phipers

**University Hospitals  
MacDonald's Women's  
Hospital**

*David Hackney, PI*  
Christopher Nau

**University of North  
Carolina - Chapel Hill**

*John Thorp, PI*  
Kelly Clark  
Inez Dufresne  
Chelsea Grinnan  
Molly Leatherland  
Kathy Lloyd  
Hannah Nunn  
Sally Timlin

**University of  
Pennsylvania**

*Samuel Parry, PI*  
Christina Fazio-Pizzi  
Anna Filipczak

Emily Long  
Meaghan McCabe  
Abigail Roche  
Haresh Sehdev

**University of Pittsburgh**

Jeanette Boyce  
Reagan Devine  
Francesca Facco  
Sarah Hankle  
Rachel Hines  
Maura Hohn  
Sharon Price  
Kayli Rodgers  
Marina Rushchak  
Frank Sciurba  
Hyagriv Simhan  
Jason Styer  
John Vargo  
Sarah Whelan

**University of Texas  
HSC at Houston**

*Hector Mendez-  
Figueroa, PI*  
Karen Castelan-Balbuena  
Cynthia Edmonds  
Luz Garcia  
Adrienne Gross  
Felecia Ortiz  
Juanita Rugerio  
Zina Spears  
Jenifer Treadway

**University of Texas  
Medical Branch at  
Galveston**

*George Saade, PI*  
Jennifer Cornwell  
Luis Pacheco  
Ashley Salazar  
Lisa Thibodeaux  
Jennifer DeVolder

**WakeMed**

*Carmen Beamon, PI*

**Yale University**

*Christian Pettker, PI*  
Donna Allard  
Sherrie Bitterman

Monika Lau  
Jessica Leventhal  
Lauren Perley  
Linda Rink

**Administrative  
Coordinating Center at  
Research Triangle  
Institute International**

*Lisa Newman, PI*  
Quinn Barnette  
Patricia Ceger  
Mike Enger  
Katie Fain  
Tonya Farris  
Sean Hanlon  
David Hines  
Kevin Jordan  
Beth Linas  
Meisha Mandal  
Susan Nance  
Lisa Newman  
Claire Quiner  
Rita Sembajwe  
Gwendolyn Shaw  
Vanessa Thornburg  
Kendall Tosco

**Clinical Science Core at  
NYU Langone Health**

*Rachel Gross, PI*  
*Leora Horwitz, PI*  
*Stuart Katz, PI*  
*Andrea Troxel, PI*  
Precious Akinbo  
Ramona Almenana  
Malate Aschalew  
Lara Balick  
Jasmine Briscoe  
Shari Brosnahan

Alicia Chung  
Stanley Cobos  
Nakia Croft  
Angelique Cruz Irving  
Jasmin Divers  
Shari Esquenazi-  
Karonika  
Elias Febres  
Catherine Freeland  
Richard Gallagher  
Jennifer Hossain  
Neha Kansal  
Tammy Kershner  
Judy Kwak  
Michelle F. Lamendola-  
Essel  
Sarah Laury  
Lei Lei  
Janelle Linton  
Max Logan  
Nadia Malik  
Gabrielle Maranga  
Lia Mamistvalova  
Maika Mitchell  
Praveen C. Mudumbi  
Erica Nahin  
J.R. Rizzo  
Johana Rosas  
Chelsea Rose  
Christina Saint Jean  
Naomi Simon  
Miranda Stinson  
Mary Thomas  
Lorna Thorpe  
MeeLee Tom  
Mmekom Udosen  
Carlos Valencia  
Jessica Velazquez-Perez  
Crystal Vidal  
Amy Willerford  
Marion J. Wood

Shonna Yin  
Susanna Zavulunova

**Data Repository Core at  
Massachusetts General  
Hospital**

*Andrea Foulkes, PI*  
*Elizabeth Karlson, PI*  
*Shawn Murphy, PI*  
Shifa Ahmed  
Layne Ainsworth  
Marie-Abèle Bind  
Caryn Boehm  
Mark Bohem  
Natalie Boutin  
Victor Castro  
James Chan  
Vivian Gainer  
Randy Gollub  
James Kerr  
Doug MacFadden  
Richard Morse  
Amber Nguyen  
Bridget Perry  
Lynn Simpson  
Ravi Thadhani  
Tanayott Thaweethai  
Nich Wattansain  
Griffin Weber

**PASC Biorepository  
Core at Mayo Clinic**

*Mine Cicek, PI*  
Nancy Chang  
Evan Ellingworth  
Jordan Weyer  
Jennifer Wheeler  
Samantha Wirkus  
Nicole Zahnle

## **S8 Table: RECOVER-Adult Committees and Task Forces**

### **Executive**

Hugh Auchincloss  
Diana Bianchi  
Joe Breen  
Patti Brennan  
Jeffrey Burns  
Nakela Cook  
Emily Cunningham  
Felicia Davis Blakley  
Betty Diamond  
Mitchell S.V. Elkind  
Tonya Farris  
Lee Fleisher  
Andrea Foulkes  
Gary Gibbons  
Laurie Gutmann  
Michael Iademarco  
Stuart Katz  
Walter Koroshetz  
Eldrin F. Lewis  
Peter Marks  
Hilary Marston  
Mitchell Miglis  
Lisa Newman  
Tracy Nolen  
Carlos A. Pardo-Villamizar  
Amy Patterson  
Sam Posner  
Wendy S. Post  
Serena Spudich  
Clinton Wright  
Heather Yates  
Kanecia Zimmerman

### **Steering**

Malate Aschalew  
Audie Atienza  
Charles Bailey  
R. Graham Barr  
Andra Blomkalns  
Melissa Bondy  
Hassan Brim  
Jeffrey Burns  
Alexander Charney  
Benjamin Chen  
Mine Cicek  
John Crary  
Dawood Darbar  
Sean Deoni

Kathi Diviak  
Ray Ebert  
Jamie Elifritz  
Amy Elliott  
Robert L. Ferrer  
John Fessel  
Aloke Finn  
Thomas Flotte  
Andrea Foulkes  
Emily Gallagher  
Maria Gennaro  
Rachel Gross  
Melissa Haendel  
James Heath  
Rachel Hess  
Sally Hodder  
Carol Horowitz  
Leora Horwitz  
Vanessa Jacoby  
Sarah Jolley  
Suzanne Judd  
Elizabeth Karlson  
Stuart Katz  
Rainu Kaushal  
Lawrence Kleinman  
Jerry Krishnan  
Craig Lefebvre  
Lei Lei  
Emily Levitan  
Bruce Levy  
Daniel Liu  
Jeffrey Martin  
Grace McComsey  
Julie McMurry  
Robin J. Mermelstein  
Torri Metz  
Lucio Miele  
Sindhu Mohandas  
Janet Mullington  
Shawn Murphy  
Jane Newburger  
Lisa Newman  
Igho Ofotokun  
Princess Ogbogu  
Michelle Olive  
Sairam Parthasarathy  
Thomas Patterson  
Priscilla Pemu  
James (Zach) Porterfield

Antonello Punturieri  
R. Ross Reichard  
Jane Reusch  
Kyung Rhee  
Kathleen Rodgers  
Juan Salazar  
Lisa Schwartz-Longacre  
Sudha Seshadri  
Howard Sesso  
Eyal Shemesh  
Allan Shipp  
Upinder Singh  
Jessica Snowden  
Serena Spudich  
Cheryl Stein  
Melissa Stockwell  
James Stone  
Jun Sun  
Mehul Suthar  
David Systrom  
Brittany Taylor  
Stephen Thibodeau  
Andrea Troxel  
P.J. Utz  
Tiffany Walker  
David Warburton  
Gail Weinmann  
Neely Williams  
Dana Wolff-Hughes  
John Wood

### **Adjudication**

Khamal Anglin  
Emilia Bagiella  
Ryan Branski  
Rodica Busui  
Marissa Diggs  
Vivian Gainer  
Sunanda Gaur  
Linda Geng  
Sarah Jolley  
Sarah Laury  
Jai Marathe  
Lisa McCorkell  
Jarrod Mosier  
Binita Shah  
Dimpy Shah  
Tiffany Walker  
Peter Whitesell

### **Ancillary Studies**

Hassan Ashktorab  
Christine Bevc  
Karyn Bischof  
Yu Chen  
Lori Chibnik  
Dani Dumitriu  
Jennifer Frontera  
Paul Goepfert  
Sylvie Goldman  
Stephen Hewitt  
Matt Huentelman  
Barbara Karp  
Jerry Krishnan  
Marrah Lachowicz-  
Scroggins  
Sarah Laury  
Bruce Levy  
Miriam Merad  
Shawn Murphy  
Janko Nikolich-Zugich  
Laura Pace  
Alice Perlowski  
Brian Reeves  
Juan Salazar  
Sujata Thawani  
Hannah Valentine  
Drenna Waldrop

### **Cardiopulmonary**

Natasha Altman  
Soham DasGupta  
Marissa Edminston  
Josh Fessel  
Aloke Finn  
Tyler Gustafson  
Francois Haddad  
Jennifer Hossain  
Priscilla Hsue  
Pavitra Kotini-Shah  
Sankaran Krishnan  
Anu Lala-Trindade  
Simon Lee  
Alem Mehari  
Patricio Millar Verneti  
Andre L Moreira  
Anoop Nambiar  
Robert Padera  
Gail Pearson  
Dhaval Raval

Franz Rischard  
Erika Rosenzweig  
Barbara Sampson  
Frank Sciurba  
Jackie Szmuszkovicz  
Julie Thompson  
Dongngan Truong  
Viola Vaccarino  
Alison Van Dyke  
George Washko  
John Wood

### **Commonalities with Other Post-viral Syndromes**

Hector Bonilla  
Christine Capone  
Sekai Chideya-Chihota  
Dane Cook  
Walter Dehority  
Monica Gutierrez  
Rohan Hazra  
Leonard Jason  
Phillip Joseph  
Dan Kelly  
Joyce Lee-Ianotti  
Vincent Marconi  
Joshua Milner  
Benjamin Natelson  
Lisa O'Brien  
Carlos Oliveira  
James (Zach) Porterfield  
Claire Quiner  
Zaki Sherif  
Nora Singer  
Inderjit Singh  
Jessica Snowden  
David Systrom  
C. Sabrina Tan  
Emily Taylor  
Vanessa Thornburg  
Suzanne Vernon

### **Core Operations Group**

Quinn Barnette  
Frank Blancero  
Mine Cicek  
Lauren Decker  
Jasmin Divers  
Ray Ebert

Tonya Farris  
Valerie Flaherman  
Thomas Flotte  
Andrea Foulkes  
Rachel Gross  
Sally Hodder  
Leora Horwitz  
Beth Karlson  
Stuart Katz  
Craig Lefebvre  
Lei Lei  
Shawn Murphy  
Lisa Newman  
Michelle Olive  
Tony Punturieri  
Lisa Schwartz Longacre  
Upinder Singh  
Stephen Thibodeau  
Andrea Troxel  
David Warburton  
Jordan Weyer

### **Health Equity/ PRO / Community Engagement**

Brett Anderson  
Sujata Bardhan  
Leah Castro-Baucom  
Deena Chisolm  
Claudia Corchado  
April Joy Damian  
Casey Daniel  
Soham DasGupta  
Walter Dehority  
Candace Feldman  
Josh Fessel  
Lisa Goldman Rosas  
Carol Horowitz  
Janice John  
Dhruv Khullar  
Keila Lopez  
Karen Lutrick  
Carina Marquez  
Shelly McDonald Pinkett  
Larissa Myaskovsky  
Lidia Regino  
Kim Rhoads  
Gelise St John Thomas  
Sarah Stewart de Ramirez  
Joel Tsevat  
Carlos Valencia  
Nita Vangeepuram

Anita Walden  
Zanthia Wiley  
Neely Williams  
Shonna Yin

### **Immunology & Hematology**

Hulya Bukulmez  
Chris Chute  
Karen Costenbader  
Betty Diamond  
Rao Divi  
Nahed El Kassar  
Nathan Erdmann  
Frances Eun-Hyung Lee  
Alicia Gaffney  
Sacha Gnjjatic  
Jason Goldman  
Timothy Gondre-Lewis  
Jim Heath  
Jennifer Hossain  
Chao Jiang  
Ellen Kraig  
Joy Liu  
Aprajita Mattoo  
Joshua Milner  
Sindhu Mohandas  
Janko Nikolich-Zugich  
Princess Ogbogu  
Michael Peluso  
Bellur Prabhakar  
Jay Raval  
Marian Sullivan  
Paul Thuluvath  
PJ Utz  
Sidney Whiteheart

### **Integrative Physiology**

Nina Caplin  
Dawood Darbar  
Steven Deeks  
Katie Fain  
Aloke Finn  
Thomas Flotte  
David Goldstein  
Meredith Hay  
Ellie Hirshberg  
Charles Howell  
Barbara Karp  
Dean Kellogg

Rebecca Letts  
Meisha Mandal  
Janet Mullington  
Asa Oxner  
David Putrino  
Jacqueline Rutter  
Joel Trinity  
John Wood  
Roham Zamanian

### **Mechanistic Pathways**

Christian Bime  
Steven Bradfute  
Benjamin Chen  
Tom Connors  
Krista Coombs  
Glenn Fishman  
Maria Gennaro  
Timothy Henrich  
Prasanna Jagganathan  
Judith James  
Boris Juelg  
Christina Kim  
Sindhu Mohandas  
Michael Portman  
Brian Reeves  
Jalees Rehman  
Ignacio Sanz

### **Metabolic Disorders**

Leyna Aragon  
Irina Buhimschi  
Floyd (Ski)  
Ralph DeFronzo  
Emily Gallagher  
Jennifer Hossain  
Mandana Khalili  
Angesom Kibreab  
Tracey McLaughlin  
Nandini Nair  
Venkat Narayan  
Elizabeth Phillips  
Jane Reusch  
Ivonne Schulman  
Aasma Shaukat  
Deborah Wexler  
Jonah Zaretsky

### **Microbiology**

Bill Alexander  
Ami Bhatt

Hassan Brim  
Shari Brosnahan  
John Coffin  
Adolfo Garcia-Sastre  
Maria Gennaro  
Joerg Graf  
Timothy Henrich  
Hye-Sook Him  
Nahed Ismail  
Jeanne Marrazzo  
Rebecca McGrath  
Sindhu Mohandas  
Christopher Montgomery  
Radu Postelincu  
Ryan Ranallo  
Adam Spivak  
Mehul Suthar  
Mary Thomas  
Guangming Zhong

### **National Community Engagement Group**

Teresa Akintonwa  
Jasmine Briscoe  
Heather Elizabeth Brown  
Megan Carmilani  
Marta Cerda  
Debra Copeland  
Felicia Davis  
Roberto Garcia  
Nick Guthe  
Yvonka Hall  
Kevin Kondo  
Fadwa Lawrence  
Lydia Lerma  
Jacqui Lindsay  
Christine Maughan  
Thomas (Tony) Minor  
Marjorie Roberts  
Nitza Rochez  
Brittany Taylor  
Susanna Tranguch  
Hyatt Vincent  
Heather Yates

### **Neuropsychiatric**

John Andrefsky  
Bryan Bander  
Douglas Bremner  
Michael Carrithers  
Melissa Cortez



Richard Gallagher  
Alejandra Gonzalez  
Joanna Hellmuth  
Barbara Karp  
Tammy Kershner  
Shawn Murphy  
Ganesh Murthy  
Sharon H. O'Neil  
Lisa Prentiss  
Caitlin Rollins  
Jonathan Rosand  
Scott Russo  
Amy Salisbury  
Alan Seifert  
Sudha Seshadri  
Eyal Shemesh  
Wendy Silver  
Naomi Simon  
Leanne Williams

### **Omic**

Masanori Aikawa  
Hassan Ashktorab  
Noam Beckmann  
Mike Enger  
Joaquin Espinosa  
Xiaowu Gai  
Stephen Hewitt  
Benjamin Horne  
Jessica Lasky-Su  
Cheryl Maier  
Meisha Mandal  
Lucio Miele  
Emmanuel Mongodin  
Lauren Nichols  
Nadia Roan  
Mark Russell  
George Saade  
Kumar Sharma  
Stephanie Shiau  
Jun Sun  
Stephen Thibodeau  
Sam Yang

### **Participant Experience**

Nina Blachman  
Natalie Boutin  
Phoebe Burton  
Marina Catalozzi  
Cheryl Clark  
Beth Dworetzky

Belinda Edwards  
Robert L. Ferrer  
Beatrice Huang  
Suzanne Judd  
Sarah Laury  
Hugh Musick  
Divya Pathak  
Kristen Pogreba-Brown  
Hengameh Raissy  
Lynne Richardson  
Russell Rothman  
Laura Wagner  
Ann Wallace

### **Population Science**

Paul Barach  
Melissa Bondy  
Victor Castro  
Mine Cicek  
Joanne Elena  
Kacey Ernst  
Josh Fessel  
Dan Fort  
Brian Hendricks  
Bertha Hidalgo  
Cory Hussain  
Carmen Isasi  
Dan Kelly  
Adeyinka Laiyemo  
Margaret Lanca  
Juan Lewis  
Beth Linas  
Heidi May  
Kimberly McHugh  
Naoko Muramatsu  
Girish Nadkarni  
Susan Nance  
Kian Nguyen  
Priscilla Pemu  
Lisa Postow  
Suchitra Rao  
Dimpy Shah  
Sidd Shenoy  
Stephanie Wilson  
Dana Wolff-Hughes

### **Presentations and Publications Oversight**

Ingrid Bassett  
Diana Berrent

Andra Blomkalns  
Hassan Brim  
Rebecca Clifton  
Nathan Erdmann  
Kristine Erlandson  
Josh Fessel  
Valerie Flaherman  
Margot Gage  
Mark Goldberg  
Edmond Kabagembe  
Tammy Kershner  
Patricia Kinser  
Jonathan Klein  
Gregory Laynor  
Grace Lee  
Grace McComsey  
Brian McCrindle  
Julie McMurry  
Girish Nadkarni  
Priscilla Pemu  
Dustin Rabideau  
Erika Rosenzweig  
David Warburton

### **QA/QC Data Integrity**

Audie Atienza  
Charlie Bailey  
James Chan  
Mine Cicek  
Hannah Davis  
Kathi Diviak  
Ray Ebert  
Dan Fort  
Jennifer Gander  
Janos Hajagos  
Kellie Hawkins  
Shahidul Islam  
Dan Kelly  
Tammy Kershner  
Patricia Kovatch  
Michelle Lamendola-Essel  
Simon Li  
Daniel Liu  
Holden Maecker  
Emily Pfaff  
Anisha Sekar  
Zaki Sherif  
Vignesh Subbian  
Anand Viswanathan  
Jennifer Wheeler  
Meredith Zozus

## **Study Design**

Yvette Burgos  
Chris Chute  
Katharine Clouser  
Juan Espinoza  
Megan Fitzgerald  
Valerie Flaherman  
Elizabeth Karlson  
Barbara Karp  
Lawrence Kleinman  
Adeyinka Laiyemo  
Emily Levitan  
Gabrielle Maranga  
Gailen Marshall  
Jeffrey Martin  
Robin Mermelstein  
Torri Metz  
Sindu Mohandas  
Jennifer Muszynski  
Jane Newburger  
Igho Ofotokun  
Sairam Parthasarathy  
Kyung Rhee  
Lumy Sawaki-Adams  
Mary Beth Scholand  
Howard Sesso  
Nora Singer  
Jessica Snowden  
Cheryl Stein  
Lauren Stiles  
Melissa Stockwell  
Kelan Tantisira  
Barbara Taylor  
Tanayott Thaweethai  
Juan Wisnivesky
